# Supplementary material for: Live imaging reveals chromatin compaction transitions and dynamic transcriptional bursting during stem cell differentiation in vivo
Source: eLife. 2023 Mar 7;12:e83444. doi: 10.7554/eLife.83444 (PMC10027315; doi:10.7554/eLife.83444)
Supplement: Figure 1—source data 1. [file elife-83444-fig1-data1.xlsx]

## Sheet: Panel E
Fluroescent Bins	Individual Basal Nuclei
0	0.326273	0.234843	0.311926	0.312873	0.148975	0.329773	0.197645	0.232782	0.212832	0.282774	0.196495	0.260816	0.304388	0.239086	0.260589	0.317602	0.257502	0.228683	0.20551	0.183604	0.244815	0.298524	0.228632	0.189858	0.248911	0.216529	0.235962	0.202878	0.184195	0.186091	0.125884	0.185507	0.270818	0.175489	0.136557	0.245965	0.284525	0.250787	0.221312	0.189578	0.225701	0.191623	0.149996	0.20256	0.142908	0.191008	0.273673	0.206982	0.33673
10	2.94209	1.69398	2.88532	2.50093	1.25606	2.82337	1.27495	2.42415	1.51255	2.23078	1.68849	2.68344	2.50798	1.72018	1.93878	2.18166	1.47899	1.50645	1.39389	1.24628	1.90411	2.37462	2.14562	2.07743	2.12292	1.79738	1.7457	1.71236	1.83132	1.59167	0.72058	2.04249	2.99415	1.186	0.960104	1.39234	2.8357	2.43999	1.96071	1.63941	1.66545	1.36287	1.09497	1.51551	1.17363	1.10821	1.86518	1.85368	2.65329
20	5.67885	4.38949	6.19324	6.42625	3.4936	6.18706	3.81371	5.83293	3.79791	5.25751	4.49197	6.70055	6.21637	4.23213	4.78441	5.25675	3.81301	4.01909	3.50558	3.26314	3.97484	5.63667	5.39629	5.30226	5.34919	4.77322	4.23062	4.58987	5.25132	4.53547	2.33971	5.31087	6.51478	3.27644	2.89922	3.5006	6.36839	5.27219	4.83045	4.11254	4.00983	3.98107	3.15848	3.74735	3.50125	3.19308	3.72405	5.41635	5.83372
30	6.92769	6.08002	7.34787	8.19233	4.95122	7.23726	5.72335	7.21892	5.38279	6.30744	6.02052	7.82447	8.07057	5.95231	6.17074	6.83586	6.09422	5.83426	4.81013	5.20767	5.88915	7.26769	7.41881	7.3054	6.80437	5.95167	5.01785	5.62287	6.20594	6.05785	3.95668	5.51933	6.42956	4.30431	4.67657	4.94784	6.58417	5.01574	5.51999	5.11213	4.61048	4.73192	4.31773	4.41948	4.78564	4.09046	4.65033	6.26442	6.50189
40	6.78424	6.06793	7.11644	8.29114	5.62891	6.81363	6.07967	7.0129	5.83531	6.37813	6.34268	7.94009	8.58074	5.73806	5.931	7.35233	6.84032	6.8519	5.59345	5.95599	6.10677	7.02073	7.01724	7.01098	7.10593	6.17395	4.81739	6.03235	6.01289	6.85962	4.09124	5.95728	6.4485	4.42387	5.21229	5.18283	6.67965	4.99689	5.46329	5.17245	4.42119	4.73974	4.19345	4.51156	4.75884	4.4076	5.044	5.56288	6.63235
50	6.73923	5.86762	6.71647	7.75596	5.68149	6.4458	6.07967	6.74533	6.20105	6.28911	5.94969	7.85136	8.64933	5.72254	5.93447	6.78836	6.64884	6.71469	5.17647	5.89757	6.21557	6.78191	6.66549	6.97521	6.80676	5.95551	4.58143	5.85367	6.86657	7.03581	4.18891	6.59795	6.99581	4.06904	5.24381	5.06424	6.45814	5.28727	5.67729	5.20477	4.40845	4.78472	4.43344	4.80066	4.45695	4.53194	5.53871	4.71297	6.86682
60	6.92206	5.60343	6.53032	7.3237	6.14009	6.10842	5.82635	6.56874	6.47588	5.87542	5.83773	8.252	8.71364	5.28783	5.70168	6.916	6.50688	6.99483	5.20625	5.94486	6.36178	6.3097	6.62446	6.66428	6.48605	6.14521	4.64825	6.47161	7.86192	7.56439	4.41247	6.84083	7.05831	4.27924	5.84466	5.68354	7.18187	5.62103	6.15649	5.59685	4.5941	5.02522	4.64987	4.4379	4.29439	4.86891	5.84186	4.42173	7.19298
70	6.51703	5.69322	6.56303	6.60327	5.74283	6.60815	6.03235	6.42158	6.37049	5.8859	5.89485	8.50743	9.18737	5.31267	5.73295	6.74978	6.49038	6.769	5.55771	5.81133	6.79701	5.9759	6.0177	6.53771	6.60572	6.72198	5.10347	7.51205	8.39148	7.96429	4.7619	7.42986	7.91243	4.2561	6.47703	6.4412	7.49694	5.80582	7.13319	5.98246	4.80342	5.29115	5.12985	4.75094	4.54805	5.21669	5.88396	4.43089	7.62138
80	6.73361	5.45147	6.86741	6.16895	5.88596	6.63098	5.65376	6.3306	6.66804	6.03252	6.19416	8.23317	9.0759	5.28473	5.3994	6.78243	6.31871	6.57176	5.78109	6.00885	6.678	6.00304	6.23461	6.612	6.95754	6.98833	5.31646	8.264	8.42691	8.34439	5.30668	8.18145	8.17188	4.82885	7.48755	7.29109	7.82157	6.45824	8.19951	6.65245	5.2166	5.66462	5.67412	4.88353	4.97499	5.86179	5.95764	4.86684	7.79768
90	6.93894	5.61897	6.68377	5.97546	6.05538	7.01656	5.64262	6.40017	6.59366	6.58498	6.21701	7.64432	8.79081	5.38719	5.61829	6.38765	5.90274	6.26018	5.95086	5.86697	6.98402	6.04646	6.22289	6.62851	7.03174	7.83912	5.66518	8.86705	8.35075	8.40972	6.15966	9.14533	8.31771	5.20104	7.80058	7.78302	8.38871	7.35957	8.67506	7.48185	5.8209	6.5543	6.60838	5.27576	5.22865	6.54473	6.31342	5.45664	7.87701
100	7.51835	5.65868	6.72654	5.67494	6.20728	7.09013	5.77068	6.44566	7.07098	6.82848	6.06164	7.14689	7.66114	5.41204	5.44456	6.26892	5.84662	6.05437	5.98362	6.17576	6.84801	5.87549	6.51307	6.26806	7.37638	8.16678	6.60903	8.53202	8.3171	7.85936	6.57421	8.71503	7.61889	5.67737	8.29429	7.95652	8.74007	8.15719	8.73176	8.06997	6.74372	6.6814	7.52336	5.85397	5.64487	7.09974	6.63972	6.05195	7.69014
110	7.29052	5.86762	6.52781	5.59466	5.85967	6.87197	6.15483	6.26371	6.68664	6.59283	5.8423	6.66828	6.55291	5.78153	5.17008	6.1027	6.22957	5.99434	6.17126	5.91983	6.91601	5.9759	6.10564	5.97364	7.49844	7.59959	7.11854	7.4618	7.64408	7.20607	7.3013	8.48553	6.97498	6.56446	8.26908	8.2464	7.99152	8.41551	8.51044	8.29617	7.81398	7.47331	8.06977	6.15413	6.15041	7.83854	6.75761	6.05012	6.85625
120	6.72236	6.02131	6.09514	5.14388	5.95899	6.27838	6.22442	5.70718	6.18659	5.94088	5.84687	5.7729	4.67514	5.5735	5.62176	5.80885	5.81361	5.78281	6.36188	6.03388	6.82761	6.10617	5.79787	5.49212	6.28261	7.36965	7.59256	6.50325	6.76915	6.43003	7.92638	7.3897	5.94663	7.16228	7.98756	8.12562	6.76176	8.48528	7.04174	8.42974	8.11977	7.27191	8.15334	6.98462	6.62915	8.73232	6.49867	6.54834	5.94126
130	5.82229	6.21298	4.95057	4.50167	5.66104	5.3677	6.13535	5.52791	5.92623	5.3858	5.75548	4.50378	3.3547	5.66975	5.40982	5.19442	5.39434	5.48266	6.50782	6.00885	6.6032	6.03832	5.30836	4.87026	5.51194	6.60318	7.27725	5.60612	5.23892	5.25409	8.05443	5.82149	4.70049	7.33391	6.91191	7.14615	4.93622	7.40105	5.83641	7.52709	7.97051	7.18587	7.3905	7.24427	6.76849	9.0855	6.16816	7.04656	5.06858
140	4.89691	5.83482	4.18585	3.97266	5.6143	4.43926	6.18267	5.0891	5.22575	4.56105	5.29394	3.70789	2.25719	5.52382	4.9755	4.37519	4.94536	4.85664	6.34996	6.10343	5.71234	5.38157	4.99179	4.13009	4.51151	5.30592	7.01205	4.5452	3.81141	3.90988	7.58128	4.16531	3.67782	7.2317	6.13668	5.69452	3.47159	6.23385	4.78289	6.16989	7.29341	6.76157	6.47339	7.75803	7.14541	8.29084	5.40609	6.94215	3.92617
150	3.83653	5.29088	3.38591	3.16784	5.35141	3.76195	5.29744	4.66099	4.49013	4.22852	4.65648	2.2855	1.44906	5.50829	4.39526	4.0279	4.36433	4.40214	5.63812	5.72788	4.55967	4.48057	4.26193	3.64857	3.67144	4.12363	6.36889	3.31118	2.67968	3.05862	6.66102	2.6889	2.69492	7.035	4.47698	4.27364	2.52444	4.5896	3.65439	4.95271	6.03932	5.94228	5.58627	7.28846	6.96856	6.7934	4.82295	6.20032	2.91421
160	2.75926	4.44302	2.45768	2.7397	4.62698	2.96289	4.63491	3.40344	3.86817	3.59752	4.14011	1.49499	0.990332	5.17295	4.04086	3.5144	4.06391	3.80471	5.13775	4.94895	3.67562	3.56871	3.49689	3.41194	2.84572	2.80146	5.54616	2.57785	1.79944	2.40136	5.44993	1.74607	2.00936	6.06499	3.00006	3.46547	1.66514	3.06413	2.7033	3.54381	4.73062	4.7769	4.82772	6.24436	6.08967	4.87251	4.09246	5.33392	2.14908
170	1.69043	3.7385	1.86904	2.28274	3.87626	2.40735	3.87495	2.39204	2.96518	3.14456	3.4181	0.73136	0.775975	4.63578	3.83934	2.79311	3.5225	3.23872	4.10127	4.0671	2.54675	2.76541	2.81979	2.68552	2.07266	1.92193	4.30997	1.85382	1.36021	1.65898	4.26054	1.13599	1.44878	5.06412	2.07357	2.48161	1.09991	1.84413	1.66075	2.24046	3.76957	3.87939	3.89132	5.03637	5.06788	3.15704	3.52406	4.07371	1.59726
180	1.03789	3.03224	1.62503	1.79696	3.47608	1.72751	3.07046	1.60004	2.43827	2.38787	3.01369	0.389879	0.589484	3.78811	3.57528	2.19056	2.91176	2.80136	3.3656	3.12404	1.84971	2.05167	2.02544	2.19024	1.43363	1.25702	2.82528	1.41828	0.913889	1.18385	3.37935	0.784104	0.969642	4.01311	1.6513	1.61634	0.779102	1.01635	0.949263	1.33135	2.79032	2.56541	3.05134	3.47114	3.89603	1.77133	2.71989	3.10657	1.27111
190	0.720052	2.43822	1.28292	1.56437	2.65818	1.07557	2.15461	1.05956	1.92169	1.84065	2.17972	0.311903	0.493023	2.72931	2.87342	1.65331	2.17887	2.07244	2.40357	2.21437	1.26828	1.6256	1.70008	1.84355	1.156	0.768391	1.54315	0.95855	0.669477	0.776038	2.53722	0.541223	0.677992	2.85797	1.37398	1.06951	0.553773	0.722192	0.590774	0.825093	1.88933	1.74025	2.22851	2.13977	2.75277	0.967655	2.20201	2.19988	0.904411
200	0.390966	1.76132	1.01879	1.30089	2.15575	0.728038	1.46981	0.834805	1.28112	1.37722	1.71819	0.268882	0.315106	1.75744	2.30708	0.958741	1.5021	1.29491	1.86746	1.57454	0.683441	0.933565	1.13437	1.38954	0.78742	0.542281	0.927144	0.787314	0.471113	0.552333	1.64301	0.378665	0.49429	1.8706	1.12817	0.715933	0.366636	0.550601	0.526759	0.545035	1.29414	1.21231	1.46567	1.23009	1.89175	0.538787	1.93255	1.46903	0.657593
210	0.31221	1.17767	0.847735	0.996254	1.51896	0.466756	1.00771	0.607374	1.08482	1.0604	1.29321	0.236616	0.229363	1.26995	1.68514	0.558029	1.28091	0.960467	1.17051	1.06268	0.513431	0.721884	0.791418	0.960295	0.449955	0.41198	0.580509	0.502541	0.315256	0.370202	1.1156	0.254356	0.484821	1.37499	0.87817	0.566597	0.30744	0.399751	0.387753	0.389927	0.715326	0.8056	0.876404	0.743946	1.29868	0.295522	1.52836	0.831593	0.576496
220	0.188451	0.813317	0.714411	0.697789	1.02238	0.261282	0.72377	0.417402	0.756276	0.816904	0.85681	0.201662	0.188635	0.971869	1.46277	0.394776	0.782411	0.611726	0.738645	0.759451	0.306018	0.382653	0.433814	0.709903	0.356613	0.241439	0.415544	0.301524	0.237328	0.340506	0.709728	0.240968	0.401492	0.833092	0.556734	0.349182	0.246334	0.284728	0.26155	0.189578	0.476884	0.592468	0.522842	0.423534	0.85209	0.191008	1.21469	0.450599	0.407249
230	0.143448	0.514583	0.515684	0.531061	0.531635	0.15474	0.523342	0.369241	0.510383	0.560312	0.580346	0.153263	0.18006	0.673787	0.958966	0.258237	0.389555	0.445931	0.512286	0.433972	0.248215	0.181828	0.296049	0.536554	0.236944	0.147546	0.22761	0.264299	0.16117	0.174213	0.36029	0.175945	0.229154	0.4744	0.283619	0.298671	0.206233	0.152735	0.221312	0.127103	0.300328	0.357827	0.295706	0.386705	0.518042	0.147761	0.743127	0.230795	0.306759
240	0.0956319	0.334997	0.349659	0.312873	0.330081	0.129373	0.295076	0.270241	0.336812	0.379651	0.335869	0.107553	0.126471	0.425387	0.545499	0.192936	0.293817	0.280136	0.345495	0.294879	0.142809	0.113982	0.216907	0.357703	0.181897	0.0996417	0.160788	0.134011	0.131062	0.174213	0.217042	0.152996	0.22726	0.277697	0.151264	0.259141	0.135579	0.10748	0.184731	0.103406	0.165635	0.23073	0.152139	0.292791	0.289389	0.104514	0.442087	0.177675	0.252107
250	0.0618794	0.157138	0.228914	0.168787	0.16358	0.0735649	0.153105	0.160539	0.198368	0.170188	0.171362	0.118308	0.0621637	0.226666	0.218894	0.136539	0.12545	0.162936	0.160834	0.161349	0.139408	0.0759878	0.131903	0.225628	0.105309	0.0747313	0.121113	0.109814	0.0956395	0.0989844	0.162782	0.110922	0.210215	0.16199	0.0861363	0.180081	0.112664	0.0659966	0.117057	0.112023	0.10921	0.193579	0.0792834	0.200718	0.169703	0.0973061	0.212623	0.0915852	0.165721
260	0.0028127	0.00172679	0.00251553	0.00205838	0.00292107	0.00253672	0.00278373	0.00267566	0.00206633	0.00261828	0.00228483	0.00268882	0.00214358	0.00310501	0.00347451	0.00296824	0.00330131	0.00285853	0.00297841	0.00278187	0.0034002	0.0054277	0.00293118	0.00275156	0.00239338	0.00191619	0.00208816	0.00372252	0.0017711	0.00197969	0.00217042	0.00191245	0.119311	0.00192845	0.00210088	0.0219611	0.00190956	0.00188562	0.00182902	0.00215429	0.00182017	0.00195534	0.0021428	0.00184145	0.00178635	0.00180196	0.00210517	0.0018317	0.00176298
[truncated: 1 more columns]

## Sheet: Panel G
	WT			Mutant
0	0.252264	0.24522	0.281151	0.270972	0.283665	0.305697
10	2.40933	2.37987	2.71404	2.41964	2.59808	2.98479
20	6.31657	6.10411	6.47279	5.20785	5.73546	6.57446
30	6.85843	6.56779	6.66496	5.72788	6.3724	6.82633
40	6.39048	6.2013	6.06457	5.75712	6.10928	6.31344
50	6.0322	6.04348	5.69039	5.62326	5.79544	5.91247
60	5.83639	6.19986	5.54874	5.57275	5.63862	5.74052
70	5.80648	6.48623	5.59094	5.59282	5.63686	5.73557
80	5.90997	6.79818	5.78331	5.69553	5.72412	5.75568
90	6.12156	7.00465	6.01967	5.87781	5.90464	5.87198
100	6.35115	7.06655	6.26801	6.02126	6.04875	5.9184
110	6.43494	6.82362	6.39835	6.21948	6.1542	5.88569
120	6.29825	6.3854	6.32585	6.25924	6.15297	5.8052
130	5.93529	5.66063	5.97412	6.11382	5.94403	5.5549
140	5.28258	4.84148	5.41461	5.75259	5.51041	5.19382
150	4.46642	3.91173	4.67368	5.1627	4.87829	4.63544
160	3.62608	3.06734	3.82096	4.41907	4.11161	3.93677
170	2.82036	2.35159	3.00251	3.62793	3.31948	3.22468
180	2.12755	1.76938	2.26494	2.79925	2.55828	2.48135
190	1.55164	1.29899	1.67338	2.0695	1.8976	1.82772
200	1.1152	0.948547	1.21258	1.46382	1.34506	1.29892
210	0.796185	0.67528	0.838628	0.975996	0.926936	0.883283
220	0.535009	0.47556	0.569381	0.624509	0.608828	0.582564
230	0.362145	0.334281	0.368757	0.388929	0.38593	0.373279
240	0.226808	0.222421	0.226176	0.226663	0.229957	0.227491
250	0.134452	0.13275	0.129549	0.123301	0.12714	0.134351
260	0.00228206	0.00374548	0.0079573	0.00630352	0.00196175	0.0151914

## Sheet: Panel G1
WT Day 0			Mutant Day 0
2.42449	-19.8097		-6.90475	-29.7745
8.06955	-8.50189		-72.5702	-8.85096
-13.0888	-45.7441		-86.8972	-17.2835
-34.6119	-16.6333		-37.1637	-11.2675
20.2408	-47.3139		-71.1478	4.76016
66.4435	15.8653		17.6748	-15.8234
-51.4087	-43.0413		7.33833	-46.3935
-23.9011	7.44632		-51.4816	-31.9616
86.1046	-10.0278		-60.4315	-36.5648
-21.6925	-45.7239		-32.0065	-26.063
22.8936	-21.5732		-37.0387	-28.9309
-19.4295	-2.79313		-79.3879	-4.57974
-11.8037	-41.8244		-32.621	-60.5353
51.0719	36.6827		-35.1026	-44.6778
24.7279	-29.7518		2.79821	-45.969
10.8404	-10.0946		-26.4609	-38.5165
-6.59144	4.05154		-10.6707	-6.07425
43.2046	-32.576		-70.793	-34.3335
38.3106	-18.9835		-58.342	-40.1298
-8.29235	-54.7324		-76.4742	-33.7102
21.683	-9.17224		-35.4013	-62.6399
-2.99638	38.7034		-51.4036	-2.77288
22.7971	-23.3342		44.7095	-53.2119
-37.9736	-13.4613		-34.3999	-11.1173
-38.8877	6.18282		-66.5491	-21.8866
65.3832	1.65505		-19.1059	-47.3567
3.08435	-44.1462		-38.8408	-33.1942
-66.3175	-30.1704		-59.1281	-39.1479
-24.8955	-31.6024		-31.6033	-21.2342
-0.820654	-41.8456		-29.7031	-36.4362
-37.8093	-44.2393		-8.45007	-33.0699
-54.1592	-37.9926		48.4138	-52.1143
-37.9263	-46.3446		-69.8598	-14.0011
48.7272	-47.7852		-1.94047	-58.9087
79.3527	14.2338		0.954337	-37.3537
20.5154	12.4411		-17.4009	-45.7148
28.2453	-9.87123		20.8359	-57.4
-4.26878	5.93184		-36.7475	-57.4978
78.9302	-2.34976		-37.0087	-33.5007
50.2179	11.0489		51.8567	14.3514
12.8812	7.59058		26.2485	-61.8592
-67.2843	12.3477		4.92029	-67.6846
56.7415	15.7876		-21.0075	-63.7396
-33.3573	-15.5257		17.7939	-63.8083
66.6204	11.5022		-66.2504	-42.7893
-48.2452	-38.4408		-22.9754	-64.5215
15.8558	13.7371		-69.9423	-45.7222
84.9763	-1.62129		-60.9909	-5.82491
-12.3871	18.9613		-33.1611	-19.5384
12.9548	13.7811		-32.8268	-35.3615
2.04814	-0.137512		-80.8379	-33.6051
65.1338	-29.295		-22.0952	-10.0083
3.96192	-46.7386		-40.5068	-60.8159
-18.4045	-4.76717		3.35798	-45.4108
69.6115	12.2466		-30.4948	-40.3651
-11.8846	16.9011		27.3806	-44.8192
105.092	-4.33696		-35.6582	-62.7292
47.2827	-19.2806		-8.33758	-67.893
85.5988	-19.7401		0.620014	-66.8724
-14.6339	-10.7372		-74.7833	-41.4114
7.81472	-6.64478		82.6277	-26.451
75.1009	-27.7825		60.6605	15.8878
86.3325	-23.9451		-59.2843	-15.9041
82.3047	-28.6558		-14.8916	-49.0707
-32.918	-1.91951		-8.29879	-60.5231
67.1376	15.6464		22.5728	-47.4686
100.217	-14.8056		7.84056	-9.86087
83.9959	-32.0342		-7.98453	-21.4463
-2.3527	-43.1155		-66.9728	-37.9973
50.7183	-43.4454		-77.0094	13.832
87.828	2.05452		-70.8318	-28.826
91.3246	-3.0786		27.4278	-42.4354
82.3218	12.7494		-86.2378	-12.9851
100.732	-5.06039		44.3295	-40.5147
6.6249	-13.2338		-71.6788	-29.8604
10.5196	-47.5493		17.0528	-3.37133
57.3298	-21.1226		-36.9412	-26.0592
55.7717	-21.1664		20.8233	-7.68089
-18.9695	-15.6867		14.3646	-46.2828
66.9438	-31.7979		91.8598	12.136
69.1945	-29.8398		-71.2009	-32.3805
44.8818	-6.84415		4.01143	-11.772
5.80813	-34.5851		-32.0724	-27.9791
71.1175	15.5971		-35.2382	-37.5105
5.96518	-55.538		4.48901	-22.6689
-27.602	-47.5616		-78.0489	-40.7341
55.3066	-39.1408		18.7993	-57.3741
0.383545	-47.1304		-36.7205	-39.3544
47.9426	-12.8288		-19.4995	-16.3437
71.0242	-26.2107		-82.6126	-18.2167
56.6883	-20.9722		60.1816	-22.6712
106.962	-10.8983		7.18738	-49.4575
-31.2945	-28.706		-43.7474	-42.9177
84.4247	-14.8907		-40.7425	-45.4759
108.03	-7.44637		-29.0384	-21.6227
66.4425	6.31427		-84.3899	-24.7737
19.6967	16.692		-42.2873	-49.0129
101.855	-3.05384		21.8994	-52.9953
41.9059	-18.6529		-16.1384	-15.7957
31.9421	-49.4271		-15.8757	-22.6061
66.6445	-41.8314		-27.1011	-27.2292
43.8383	-9.95367		-54.794	-42.4802
-17.0358	-26.555		-86.0833	-1.19366
-6.27863	-11.7641		-7.90986	-60.4245
30.2014	-24.94		9.56641	-58.2288
-37.4219	-45.0588		21.0225	-61.7365
-19.5406	-24.3562		8.15543	-24.4079
11.3598	-57.2501		-25.6138	-41.9432
-46.0355	-34.4004		-17.3847	33.4687
67.8437	-15.1449		25.0352	-32.021
3.39049	-22.4683		-38.1044	0.103031
41.487	16.955		1.71816	-42.4332
-22.9201	-14.7538		6.18472	-48.4904
103.473	-2.98328		7.82137	-44.166
-3.00902	-17.6324		-37.3853	-53.0187
-13.3521	-24.9071		-2.23174	-65.3724
-32.9585	12.5901		-76.8708	-41.8538
-17.7179	0.720457		22.4522	-54.2579
81.5937	-29.3653		35.5281	-56.4598
-36.526	-4.00764		58.0985	-14.8423
4.90407	-28.0949		-74.7739	15.5978
93.7709	-20.1222		-22.1734	-6.52183
46.2719	12.6099		55.562	16.7205
44.6611	16.2368		53.7383	1.58648
32.4582	-49.9703		82.6693	-28.4029
4.05297	13.884		-68.4239	32.1923
-28.165	37.6726		51.0796	9.83938
-42.0498	-22.4153		12.9103	-23.2147
-3.29376	-63.5422		-39.7444	3.50912
38.2222	30.1779		-25.2648	3.33065
42.1552	12.9224		-65.3579	-10.676
31.4394	28.1364		68.3949	9.13162
67.358	27.037		-43.2617	-15.7396
-10.3912	30.1679		40.3836	23.6193
4.60193	24.172		-41.1441	-27.481
-69.4459	20.4194		35.2486	-26.3609
-26.8133	-24.8716		30.2257	-47.914
-31.7561	20.634		19.9652	23.1533
19.4995	21.5866		46.0998	11.7763
-65.1389	13.8784		25.7454	6.45345
9.90881	25.7754		76.6156	-36.5205
-3.8764	32.7514		108.908	-10.1933
-25.0094	1.37643		-1.72907	16.3267
-21.8106	1.11721		0.330598	-1.20606
-69.5179	-16.6248		39.9352	3.71561
-79.5359	16.0926		-75.8987	5.12482
-28.1481	-12.2617		73.2241	-31.6212
2.29956	16.0232		-25.3272	-11.9454
-71.459	-6.77412		-29.7439	20.3852
45.3839	-16.2146		62.3324	-30.9027
-47.0262	-35.7096		-11.1066	2.49603
-7.35932	41.9995		23.7682	-42.5036
-42.392	-37.2728		0.151024	35.4831
-38.6116	51.3543		81.535	-19.2183
-5.5599	21.6207		-67.4912	20.9734
-81.9158	11.3236		-73.0866	-33.3646
-61.0839	43.5808		1.95602	-21.8662
-11.739	8.51409		-56.8457	14.5726
25.5408	55.2385		-26.7836	-4.71203
51.4583	17.5018		-67.7727	14.8506
-23.6377	31.4563		-70.7715	11.7311
13.8978	20.4025		-59.7817	30.6637
-83.7336	3.85093		-82.1864	3.64279
-4.26245	19.3218		-18.3006	32.3628
-15.3238	-14.3477		16.1366	7.95567
23.3336	10.183		-9.82404	-10.5895
-57.7808	30.3017		23.1197	-23.8169
4.18588	17.2306		-18.7299	-12.738
8.78842	9.48079		-24.1451	33.9844
45.3222	36.0717		-15.0245	-22.502
68.8033	4.18487		30.248	31.7657
6.31483	37.0238		31.8341	35.02
11.3273	39.9404		36.8485	22.4284
-24.1131	24.4766		0.507739	51.6687
-27.5457	-1.37779		-25.8798	36.1052
-15.0434	9.7707		40.98	31.1882
-26.3897	27.9994		25.892	57.3213
40.4914	25.4686		10.6758	45.0485
-14.3691	40.1578		61.6622	34.7137
58.7866	24.4963		-30.6882	15.6065
49.4835	-13.5938		42.2293	24.1979
-0.857949	-12.4184		1.90515	32.7721
-5.27111	5.24304		-27.3125	58.8457
-8.79876	22.752		-1.35382	33.4649
23.2161	19.4668		19.5313	32.3088
-2.18728	34.5475		-64.6431	35.6112
-21.2887	30.69		9.16322	35.0631
43.3636	38.2962		-6.98748	29.3785
-2.42639	34.1847		31.1359	-33.8781
-64.7619	18.2284		55.391	36.2655
-49.6119	26.5529		-27.2214	32.662
11.8785	41.0983		-16.1617	55.2192
-28.5279	26.2498		-73.3661	14.7026
-28.5166	33.0254		-80.9884	16.3578
-18.2799	26.8364		17.0712	33.1989
100.331	10.8631		-63.1408	20.7173
-25.2109	-7.18007		44.708	-47.3524
1.96067	-14.2166		3.27881	44.7894
-68.1803	20.1063		-27.9947	19.1134
16.6078	24.1604		-68.9707	34.317
4.34914	11.3328		-73.2714	5.46693
-9.11327	12.9747		2.72011	3.98189
28.0367	16.8475		4.88137	48.4752
-24.6139	32.8713		-29.571	22.3353
-10.5223	25.9686		-7.51044	49.6207
-22.6476	24.6961		-36.6282	26.4966
-42.6994	25.1341		7.763	19.3507
-18.2398	30.238		-4.56168	45.2485
-19.7736	20.6475		-44.1313	12.8527
12.3743	19.243		-44.1924	12.5297
12.2845	42.393		-6.48181	18.1697
20.2281	20.2415		-29.1086	17.9354
-41.4977	14.3553		35.3102	29.5806
-60.375	-4.6751		25.2464	30.983
43.9894	35.0048		33.1983	35.3267
0.923428	15.8172		32.9296	46.3126
107.618	-6.83091		16.0975	46.2092
1.94927	34.0315		-5.33837	19.5669
38.7538	21.7922		28.8277	53.4845
-19.0312	-3.97346		16.9582	54.4473
45.8451	-0.1771		68.213	12.2041
75.1549	-31.1389		19.007	-16.4468
42.3726	-20.0183		49.7652	13.7478
99.4924	1.27034		-50.9006	53.648
-3.6362	0.959545		1.01076	54.9412
-1.95187	38.0324		-25.3286	63.0385
1.38947	-17.0266		19.4809	45.6049
41.254	-19.5862		-8.08419	53.962
-1.09187	4.49856		-18.4501	67.1796
-40.7826	-5.23282		17.488	47.4996
0.631513	38.2897		-13.209	57.2612
105.77	6.01082		-13.1579	61.607
-25.2656	-8.99567		22.2352	54.097
25.2593	3.79168		-9.14849	32.4262
-42.837	-11.1666		23.5884	55.9553
-4.3605	-46.0402		32.8005	38.841
-73.1192	15.6091		60.422	-5.40454
50.7184	-15.8783		18.9986	-22.4162
-4.00734	-17.7057		-77.5652	16.9356
-6.50549	-36.8645		39.8641	-44.8793
-24.1542	-19.1548		-23.4682	-23.1419
-28.4617	-8.00746		22.3665	-53.2091
-68.5152	21.2417		18.6762	42.5085
16.6878	22.4792		23.287	53.5808
-29.743	22.4809		-54.649	17.939
7.41018	34.0726		46.8439	-35.5156
59.4845	-23.9826		-15.4021	34.0281
-68.6324	5.29025		24.8784	-1.72496
57.7853	21.3005		-10.0567	54.5043
-21.0699	18.1721		-14.3013	65.081
42.6267	29.4067		11.5102	50.7943
-41.2737	13.2411		1.85374	40.4359
9.11037	38.0953		7.30788	45.7748
-1.24599	-16.2393		26.9897	33.5876
-12.9987	-2.94053		-29.6395	36.9121
24.3894	48.3631		-64.007	27.8263
-12.1534	18.646		-53.6378	46.967
-42.1835	16.0587		-15.6506	53.6455
52.2366	37.2931		5.66291	38.2458
41.9262	24.7752		-39.9697	54.8223
-59.3448	14.9077		-17.0246	41.6669
-15.2257	-24.4415		-17.631	44.69
39.4254	37.3897		24.2954	52.3169
6.42623	-2.46636		-66.3109	17.9486
5.29604	33.2105		-15.3771	64.7224
-27.2004	34.0248		-53.8144	52.0736
-38.0813	13.0953		-61.4114	45.6055
74.9404	-25.2799		0.263196	43.3585
23.2033	14.3812		-18.3977	66.9408
0.511134	14.1552		14.8731	48.1939
72.5401	12.5328		0.796428	47.3019
38.9946	33.6136		-24.821	38.9044
-19.9026	0.458843		-11.3073	51.6373
41.6375	-16.9254		-12.4832	63.4516
-1.65436	-17.4691		-47.9918	50.8929
-13.7869	31.8399		25.6956	56.4428
58.7507	36.1696		21.8008	25.3311
-23.8254	20.089		-12.6785	-53.2591
3.28294	8.06472		37.1597	-47.5722
32.0691	11.7008		67.1757	-4.69242
30.1501	9.70414		71.2378	16.9774
-45.7428	-22.4815		50.7629	32.1457
-71.4287	8.761		30.3863	-26.3703
6.45301	-8.19567		-26.5375	35.9927
-0.896594	18.5651		-10.4644	-29.6216
-27.2211	-14.3137		-27.3968	18.2312
99.3593	10.9784		-8.70197	31.3915
-61.1217	22.6153		41.5538	-32.2581
-66.1594	26.3371		35.989	-49.9007
-51.7858	23.3421		-36.3507	-11.6761
-2.10789	12.6706		-33.4357	56.2589
45.7274	23.5618		-57.1129	-7.72493
18.6641	19.2282		20.753	-9.18086
-15.3853	39.1472		26.5495	38.1042
-12.6388	24.6175		32.6617	30.9605
-34.862	-5.1551		54.9954	23.6408
6.07911	35.3786		16.5727	32.7129
18.8634	14.24		33.8916	24.1639
54.0273	0.375814		-14.7709	33.908
64.8117	-22.068		17.0949	8.81077
2.82539	-26.8579		-73.1178	25.5931
-28.0099	-11.0656		-22.4506	50.6991
-22.2007	-4.94094		24.9529	18.5877
-18.0464	11.2053		-13.5134	-47.4616
45.4793	18.1466		23.6923	10.8169
40.413	-6.05443		-79.7499	-35.7472
47.0889	-9.11498		-57.23	24
37.8541	24.5961		-63.1162	32.5634
-54.3771	-30.3383		-30.586	9.2747
15.3298	16.2181		-22.0269	37.8918
-27.4629	29.7466		-12.9599	57.6838
20.8692	30.3695		24.2615	53.7297
-6.53121	-16.5815		-16.3695	68.2693
-9.9574	-17.5551
9.81486	15.1554

## Sheet: Panel H
	WT			Mutant
0	0.209108	0.226013	0.230725	0.267016	0.277068	0.322205
10	1.58116	2.14036	2.12839	2.79993	2.81483	3.38062
20	4.14942	5.34662	5.25785	6.41874	6.55883	7.11698
30	5.54164	6.28651	6.01316	6.60945	6.75414	6.79079
40	5.9818	6.20773	5.91626	6.12346	6.25355	6.0318
50	5.96505	6.24423	5.96013	5.80928	5.90721	5.56791
60	5.86898	6.37762	6.13009	5.65986	5.68907	5.31324
70	5.89032	6.62305	6.42244	5.66079	5.61052	5.18685
80	6.1111	6.89026	6.74066	5.80253	5.67518	5.26521
90	6.38875	7.17061	6.96084	6.02542	5.81483	5.35128
100	6.59282	7.20439	6.99367	6.20473	5.90261	5.53752
110	6.67985	7.03151	6.86664	6.25367	5.89245	5.68689
120	6.61573	6.56459	6.50403	6.15832	5.81929	5.77988
130	6.28553	5.8424	5.95636	5.81143	5.61679	5.6933
140	5.73974	4.95716	5.24737	5.27405	5.26395	5.41515
150	5.00317	4.01605	4.43104	4.6089	4.70766	4.93258
160	4.17546	3.11518	3.53414	3.86143	4.0385	4.29152
170	3.29628	2.33397	2.69208	3.09281	3.29703	3.55425
180	2.49381	1.70382	1.96618	2.36028	2.57681	2.79383
190	1.83984	1.20549	1.39371	1.76131	1.92496	2.07544
200	1.29828	0.850758	0.97091	1.24995	1.35566	1.47582
210	0.901541	0.612495	0.647175	0.864677	0.908681	0.999335
220	0.608468	0.436783	0.434888	0.58218	0.602527	0.651796
230	0.396651	0.301492	0.28925	0.375494	0.378072	0.402027
240	0.245723	0.192085	0.191156	0.230836	0.229305	0.245141
250	0.137824	0.11683	0.118973	0.13135	0.128513	0.136864
260	0.0019732	0.00200289	0.00188373	0.00212305	0.00195949	0.00179754

## Sheet: Panel H1
WT Day 1			Mutant Day 1
-92.5224	26.4623		58.4078	22.1414
9.93993	-50.3027		-81.121	-14.5913
-33.1163	-35.9269		-85.5454	31.5482
-49.5784	-21.9878		94.5778	6.41703
-66.0283	34.6426		-45.9098	13.276
9.79055	-45.1977		46.8051	-24.7534
38.5277	22.0191		29.3329	-47.905
-85.162	-1.1924		-54.1502	-37.078
71.5169	-4.9064		-57.9104	-4.792
-3.4687	-34.6288		19.0223	-17.7066
63.4167	20.5193		-77.3275	3.13834
-30.8252	-59.0974		-27.4747	-24.4676
-31.5622	-57.0656		-13.5392	-1.99571
27.1375	-47.3049		-36.317	-34.5272
-26.9846	-35.8885		34.0964	-40.7166
-86.7479	-7.64883		18.0314	-50.5551
-22.9309	-61.4293		-2.67285	-14.6844
1.33088	-25.6428		9.78052	-53.4483
-58.3046	-46.4124		-72.5211	-27.8067
-85.9006	20.2897		7.75831	-18.5473
-45.8591	-54.4206		70.1199	-2.77577
-12.5276	-55.0562		-51.3059	-36.8576
-38.4136	-48.727		73.2906	-37.333
117.854	11.2428		-58.9086	20.9266
-23.5639	-39.0123		-7.47306	-45.4162
-88.8006	-5.25652		-24.2623	-18.1173
-45.2429	-44.8133		-68.8892	-17.3042
17.9615	-45.9793		-86.9379	16.9127
-87.0617	-5.87943		-46.5165	-37.6055
-43.0899	-43.3433		42.1274	-39.4185
-34.5899	-48.8805		40.9104	-43.3936
-29.433	-59.8775		-55.306	1.71732
-29.2711	-33.456		53.8131	-31.3507
-16.9611	-6.95964		-77.3516	-22.4336
25.3798	-46.2815		-57.9524	-33.9327
-43.2368	-10.8384		-62.8599	-13.793
16.4003	-47.7322		69.4759	-39.0707
-71.455	-31.9089		-56.3269	-36.9846
93.4809	-30.5741		-94.2491	14.8551
-21.6562	-60.5391		-70.2819	-21.2794
-60.196	-46.5229		69.4708	-0.909749
-9.69094	-38.6342		32.7807	-46.5374
-10.1263	-32.6581		-22.2589	-35.2364
-29.7744	-57.433		-82.4131	11.0023
-29.437	-61.0025		-18.8391	-23.0434
-88.188	-3.21206		-33.1541	-10.2996
-55.1248	-37.7485		9.27724	-50.6725
-26.9545	-37.9302		97.4628	-1.07479
-27.1049	-61.5275		-2.42528	-16.1381
12.3289	-53.3008		-73.1469	-11.719
-73.2035	-26.0507		67.8801	-6.09736
37.2679	-42.8451		-40.4811	-28.7622
-58.1525	-47.8785		-19.2772	-56.7335
4.31719	-2.25117		-72.9383	-20.1894
35.2513	-47.1632		1.51822	-37.3764
3.20388	-45.7129		-33.9095	-16.1949
-41.8063	-29.1288		-89.1921	13.1397
-31.64	-39.0411		-14.6698	-43.7829
67.7473	-7.84459		-55.8751	-25.2804
7.29557	-2.4653		16.5676	-56.8248
-76.2019	-15.2726		70.4854	-33.4154
-53.4745	-31.0831		-67.3919	-12.1631
99.6358	-20.6316		-78.6118	27.2986
9.41866	-40.708		-74.2154	33.8581
-19.333	-20.3791		-68.6107	6.46337
-53.4455	36.7676		-82.393	5.02086
103.29	-3.45514		-50.6963	-16.6372
-1.84725	-43.8283		30.299	19.544
60.1368	-38.9069		35.5291	19.6527
-32.5449	-32.4028		-53.1224	43.6489
-87.968	11.5356		73.5897	-0.670212
-12.3782	-5.71227		20.0111	-55.9913
21.3042	-36.4628		-61.5658	-33.5828
-36.3391	-36.2448		51.1368	-36.7644
36.1213	-41.7623		-64.8054	-12.1581
42.3591	-26.7357		-77.0147	32.835
68.6635	-15.6506		-37.521	-33.3431
38.4126	-23.1979		-11.5805	-5.2328
-29.0186	-28.2227		-56.077	16.1769
-16.6981	-36.2851		-82.1156	26.1128
29.9089	-38.1564		75.0755	-2.46221
24.177	-1.7799		-80.9213	34.3346
-10.5136	31.2032		42.4594	-9.58716
31.5687	-43.8184		15.5999	-53.1332
41.4734	-15.5268		-24.2771	-3.28979
101.817	-0.375617		-86.8226	25.823
36.1558	-44.38		2.82583	-38.8951
5.1288	-31.8694		-89.6301	31.0593
-10.3894	-4.91372		-39.3671	-13.5808
-50.7098	-38.1578		-63.8647	-29.3839
-50.0257	-19.0552		56.3656	5.16857
26.2971	-28.844		-67.9782	-28.4138
29.8895	-40.2135		-37.1829	-6.4382
4.5348	-41.5237		23.4331	-55.4314
-72.4802	-17.4255		59.9797	7.36028
-59.6013	-20.0589		-37.2178	-40.4874
-57.3205	-30.7616		-10.447	-38.909
-11.4285	28.3324		53.4668	-32.8399
-52.4851	-14.2348		-53.3351	-31.4185
10.3272	-10.4288		-30.0477	-21.2887
-4.01423	-39.7843		-18.4956	-27.4555
-12.0555	-13.501		-11.9706	-26.7327
-3.96865	-32.8532		-77.1111	-17.0571
101.654	-0.2566		21.8916	-42.4426
-30.8995	7.77332		5.14318	-37.998
41.4016	18.6954		-79.4805	-23.6994
-19.1091	-23.6851		-80.421	-23.3686
64.9017	-11.6752		-91.2688	29.2643
-69.1973	8.61519		-74.7557	-22.4711
99.4455	-16.8954		-94.2013	18.0862
6.0619	-23.7152		-53.2819	-50.7464
6.36046	-25.8763		-30.6641	-37.3721
97.2084	-26.8901		103.344	-22.6509
115.875	5.74563		109.693	-17.201
98.4186	10.1206		-61.9177	-32.4451
12.7474	-45.4835		-24.7422	-32.3428
-3.38385	-43.423		90.0897	3.1694
114.949	21.0503		48.09	-24.3216
13.2469	-36.5685		-45.2309	23.2792
7.43576	-18.6019		-80.913	22.2361
-87.1664	17.581		-55.4155	17.2446
4.68166	-11.4779		-61.4821	20.6361
22.5803	13.9989		-87.0922	23.2167
-71.7778	-8.77256		-81.6964	29.1831
-77.1226	-16.1738		-73.6251	35.891
-26.4254	23.4538		7.86064	-4.36272
48.7809	-40.9512		-77.5826	-22.273
-16.318	-1.95551		-23.0724	-36.5171
36.4839	-46.4439		-48.3256	-10.3973
-18.6232	-0.680266		-51.8927	1.27187
30.4585	-46.036		93.665	-8.96143
-36.139	-32.694		6.46095	-51.0066
-60.3065	-10.3366		-79.2492	-23.9588
10.0821	-49.8957		-69.3565	3.59936
-72.5641	22.9982		-69.4999	26.2856
-83.6443	31.744		-67.3512	-14.1144
-74.9004	-23.1577		25.5762	21.7628
65.811	-37.3088		19.4493	25.2322
27.5584	-27.8543		16.1914	-2.99306
94.1142	-23.3882		-15.9683	-3.29405
-90.4291	14.8364		36.4	18.0437
-72.1229	-23.9265		64.4806	-41.0888
20.9988	-56.1055		66.703	-18.9688
-16.279	-2.90369		49.3952	-34.8106
-16.8491	-9.0597		4.72499	39.597
-3.71187	-5.38537		81.8937	-0.937974
32.2571	-29.133		-40.0779	46.0076
38.6211	-27.291		-52.1907	-10.3446
-90.2964	12.0773		81.9774	-5.87496
-24.0551	2.67417		-3.90842	-46.1357
-28.5169	4.70207		-30.9182	-4.16712
-58.1702	25.7431		-52.2242	1.36394
0.838424	30.0506		-9.28359	-15.6529
60.0152	-12.3811		-35.8561	23.5417
4.50864	30.0635		-39.992	-7.76502
98.6471	-26.3638		-72.4485	2.41971
-32.7788	12.2467		-38.0381	-5.52061
-94.9656	24.0995		102.355	-23.1791
102.661	-26.0408		-6.52672	-7.96127
-69.3956	2.52197		-61.0215	35.0368
76.5918	-22.9865		2.71491	-7.80421
-20.1494	-36.1083		-43.8333	0.728357
-41.715	-19.8542		-27.6565	-20.0204
-15.1076	-41.5263		31.2332	-46.831
-59.8029	-23.7547		-71.6873	1.69631
-18.388	-5.45706		-33.1734	-11.3169
-43.1469	-27.3454		-63.1897	-8.04216
3.8506	31.8557		59.0357	45.9408
13.5989	-53.2662		-33.8979	61.0679
-18.6785	27.7023		-15.4762	59.3585
41.5803	-5.53433		-19.8563	59.9273
-81.0768	34.976		28.5182	36.7026
16.6128	-50.7752		57.1238	56.5759
-12.3972	-15.9507		35.0216	58.8072
-47.3278	-36.6807		-11.4107	33.5947
35.7679	-13.3761		37.7229	56.1258
-38.754	0.461288		55.9232	40.6938
28.436	18.0178		20.6146	60.7323
-80.2738	32.9015		-16.5551	34.917
38.5371	20.9684		28.7065	48.3807
-24.8715	17.4389		6.12175	53.372
-29.8146	20.035		46.2071	58.2961
-70.9806	-4.92235		29.0968	52.9765
-16.3204	-14.5168		20.9863	68.4631
-24.6154	16.1941		-46.602	41.6525
19.9277	23.3325		49.4535	61.7156
-47.1779	-17.4342		-28.2883	10.0156
-12.0046	-39.7634		2.06752	34.536
5.63415	10.9727		36.1651	21.2282
-68.4593	-0.660331		13.3645	25.2287
-15.8093	1.65115		55.4136	52.651
-54.7397	24.5774		67.9651	-21.6152
-72.3891	31.1368		-22.7601	59.9243
-23.041	32.023		-11.2616	43.6224
68.7184	-26.478		-6.75455	59.7986
-50.0709	33.9523		45.7308	19.7514
-73.8284	-5.57246		25.3284	65.1194
-4.22829	-42.273		33.2952	52.5093
-24.1399	24.0548		53.6077	64.5835
28.0509	-22.7714		-49.2004	24.1109
-1.26534	-1.29591		60.5946	42.0849
35.9908	-44.5229		55.1323	47.9138
-8.14439	-40.496		-21.0682	71.4198
45.0943	7.1852		21.2672	9.77948
-13.5031	-7.56687		10.3571	28.3912
69.1974	-4.89338		-11.0558	61.9622
-19.2998	27.9277		14.0646	65.7327
38.4741	20.0122		44.3826	35.7835
-44.8714	25.757		67.4325	14.816
-30.5371	21.0704		-29.4312	46.5652
46.3309	-26.5222		-9.7111	57.7249
-29.0829	-25.3535		3.02434	49.1265
-3.4017	-44.6808		35.4487	18.5958
-21.7264	8.83583		43.8817	68.082
71.8939	-9.94264		41.9979	59.5748
-47.3	-35.9287		13.4431	74.4615
106.579	-20.0878		-9.98854	77.5488
-2.9373	-19.291		-2.7666	38.7859
-80.1924	2.05442		-60.6937	39.8537
110.835	12.9903		38.0219	68.3955
-72.6422	-15.3507		14.2406	49.169
71.0264	-15.5914		33.0105	61.1787
22.6256	-18.7944		7.80591	-36.7253
31.9906	-41.7174		6.77994	77.952
107.096	21.4298		-24.1522	57.176
-33.6789	-61.5196		93.7339	8.76767
46.1942	2.0964		48.8393	34.1208
-32.1466	-63.4339		8.61695	48.6396
40.9456	-45.7439		48.5125	46.5254
-11.3523	-3.90572		-0.422935	56.2234
79.0973	-1.33043		-17.1761	60.4575
115.813	21.5796		5.31923	39.4315
38.3011	-42.6925		39.0532	61.2187
110.468	18.425		-30.0315	-3.38937
88.6241	2.11173		44.7448	58.964
36.2047	-13.2078		42.6155	54.6291
34.055	20.4799		36.1618	57.2065
-4.03928	-31.8775		54.2866	51.9829
9.31362	-56.5846		37.3758	23.0398
54.9851	-18.1967		-47.8913	32.4991
62.1826	11.3372		-6.12164	60.0396
-44.315	-6.29378		-46.1779	32.3583
16.0049	-26.5607		-17.77	54.5161
-42.1105	14.2696		14.9889	51.166
42.1742	-19.7815		10.0405	30.0991
-59.0383	28.5924		45.4119	54.7271
-2.26421	-35.2301		48.9996	30.0834
105.479	-20.2896		18.0524	62.7064
43.7143	-46.0086		46.1127	55.7966
-75.9079	14.8652		40.4832	43.0212
-16.8743	-0.926985		46.2622	71.8734
2.78457	-14.4802		8.67737	74.1943
34.6292	-37.6099		7.61295	48.1746
73.4294	-38.2379		14.6478	73.4316
109.013	8.67428		44.0934	65.736
48.1172	-43.2034		43.6606	59.7164
106.698	18.5629		56.6488	35.8535
-42.4356	-2.26523		-8.0438	79.6673
53.8882	-17.1688		62.0281	31.7123
-8.37429	-8.03407		75.1845	13.1588
107.736	-7.438		-30.8274	52.6386
48.0644	-26.8474		-1.504	53.5238
61.6239	-2.74544		24.6626	42.5644
-19.544	-29.3629		58.2874	34.7946
-12.1421	-38.2968		-24.2856	58.2767
64.5161	-7.57349		-11.4362	31.1086
58.9417	-3.96479		-34.7173	71.6567
-17.7731	-39.0553		7.90183	43.4598
-23.8839	-39.9283		-56.5814	40.2823
-54.5206	30.5084		-26.5816	60.1031
-14.4445	-40.6282		-32.6602	1.25799
49.3588	-38.6305		-28.9043	56.7503
102.705	8.16186		-19.1002	39.5386
0.912156	-24.2686		59.5899	44.2868
95.7734	12.4519		47.6655	67.3333
22.0367	-33.5041		-15.6768	87.5435
39.4022	-44.5296		-16.5303	89.1986
77.8453	1.86459		-19.4856	84.5199
113.536	6.94727		-56.4801	39.7599
37.9289	-27.7519		51.0502	65.7216
58.187	-25.1978		-19.3029	88.2712
-1.96114	-7.22277		22.6783	51.0517
-13.3345	-42.0778		-19.7207	68.3201
34.2005	-45.2521		-2.44935	-18.4716
-67.8296	-28.3973		56.8036	51.7315
51.138	-34.1093		-26.2647	89.0995
113.754	22.811		-19.8834	90.9525
32.7946	-44.2631		45.7406	70.7795
97.1921	-26.885		-1.44912	32.5141
113.541	18.29		5.96676	46.2369
-21.6657	-23.1633		46.8384	67.8988
97.5638	-24.1628		-30.9074	81.7312
44.7782	-34.3736		12.4818	74.6642
-15.2431	-3.38892		48.3145	63.3327
103.189	-2.50624		-24.6445	83.7696
106.14	-22.4899		-35.8281	57.785
116.033	17.3881		22.0662	27.7262
50.3374	-22.1177		-16.044	75.4436
112.776	0.52336		-48.4326	50.0182
-63.215	5.78687		-27.5149	87.6695
-5.66039	-42.3212		-53.6313	46.0286
-27.7069	-36.7691		-23.9323	80.6407
-4.43611	-25.6299		36.8857	60.8626
-56.8381	3.95594		52.7811	62.9733
-54.5541	-30.4432		-6.25276	61.7793
99.1912	-25.5134		-32.1321	75.7691
46.5299	-24.0367		64.2889	-20.5635
44.8348	-25.7978		26.2493	11.963
106.721	7.57138		-32.4072	63.0092
-56.6256	-7.05347		46.7451	60.3719
-1.55122	-25.0241		-4.34595	55.9098
-24.2912	-26.5075
-8.25977	-4.26106
88.1875	-31.5714
-76.4595	0.989841
-35.3866	-35.3106
-3.6618	-25.6357
44.7998	-39.6827
85.8811	-24.9741
