# Supplementary material for: Live imaging reveals chromatin compaction transitions and dynamic transcriptional bursting during stem cell differentiation in vivo
Source: eLife. 2023 Mar 7;12:e83444. doi: 10.7554/eLife.83444 (PMC10027315; doi:10.7554/eLife.83444)
Supplement: Figure 2—source data 1. [file elife-83444-fig2-data1.xlsx]

## Sheet: Panel C
	Basal			Spinous
0	0.212616	0.210777	0.201997	0.260999	0.281282	0.283571
10	1.75811	1.89269	1.53996	2.67393	2.69933	2.74893
20	4.51612	5.23498	4.24991	6.18624	6.04145	6.00301
30	5.23619	6.26832	5.57946	6.93503	6.62319	6.21816
40	5.04307	5.88324	5.49304	7.32385	6.50836	5.99013
50	4.9768	5.57731	5.22553	8.07482	6.67837	6.12305
60	5.08357	5.44285	5.09036	9.06559	7.08545	6.66809
70	5.32549	5.44871	5.04611	9.81853	7.7	7.46295
80	5.70329	5.6052	5.1154	9.95841	8.2329	8.32916
90	6.12257	5.83933	5.29633	9.32791	8.44542	9.00775
100	6.51509	6.05232	5.52946	8.04158	8.2531	8.99089
110	6.85298	6.14896	5.80433	6.37465	7.55055	8.22811
120	6.96188	6.09213	6.04809	4.65053	6.44541	6.86996
130	6.78087	5.93039	6.14953	3.24382	5.09196	5.27938
140	6.27768	5.58504	6.09438	2.20419	3.83382	3.78985
150	5.5626	5.08907	5.77749	1.51535	2.70439	2.61228
160	4.64798	4.42919	5.23502	1.07561	1.87085	1.74013
170	3.70416	3.72138	4.50788	0.820839	1.24392	1.1299
180	2.81356	2.97747	3.64335	0.625159	0.84213	0.762037
190	2.02171	2.23836	2.838	0.483039	0.580384	0.524207
200	1.42241	1.60318	2.08048	0.383846	0.403706	0.383044
210	0.948841	1.10775	1.45882	0.307299	0.294125	0.280017
220	0.63726	0.741639	0.951611	0.244863	0.223315	0.215343
230	0.40976	0.45623	0.570987	0.183693	0.166451	0.161284
240	0.258669	0.275255	0.311943	0.13192	0.11885	0.116805
250	0.157094	0.146024	0.158132	0.086918	0.079936	0.080913
260	0.049635	0.00222	0.002404	0.00138	0.001359	0.001045

## Sheet: Panel E
	WT_DAY0_Basal			WT_DAY0_Spinous			WT_DAY6_Basal			WT_DAY6_Spinous			HET_DAY0_Basal			HET_DAY0_Spinous			HET_DAY6_Basal			HET_DAY6_Spinous
0	0.162409	0.201286	0.234476	0.255776	0.278412	0.332631	0.204307	0.224229	0.246586	0.291861	0.310187	0.277871	0.202776	0.198555	0.241489	0.226513	0.269546	0.29168	0.1924	0.191667	0.239751	0.300071	0.211232	0.302868
10	1.18825	1.66079	2.06741	2.41829	2.90429	3.85435	1.53972	1.89212	2.30711	3.30743	3.4009	3.07633	1.5176	1.48702	2.16544	2.22532	2.59089	3.16279	1.30612	1.35632	2.14221	2.93563	2.07291	3.81901
20	3.54212	4.19839	5.30481	5.7251	6.49296	8.17399	4.03954	4.96787	5.59453	7.12021	7.21367	6.89113	3.89916	4.02539	5.48094	5.40753	5.94405	6.87666	3.11441	3.51799	5.67565	6.07174	5.14554	8.08779
30	5.2954	5.10651	6.46692	7.13622	6.99927	8.85565	5.48083	5.89151	6.63545	7.32485	7.84173	7.37592	5.17459	5.42339	6.61311	6.78463	6.93083	7.5927	4.38825	4.77919	6.4443	6.7494	5.69902	7.76102
40	5.82538	5.19283	6.4262	7.66744	7.275	9.28654	5.79019	5.7614	6.59109	7.40489	8.16385	7.5759	5.45686	5.69236	6.62067	7.48387	7.40806	7.85808	4.86759	5.04147	6.07064	6.82639	5.56763	7.36329
50	5.77169	5.21832	6.27635	8.15002	7.85018	9.84845	5.86359	5.59719	6.50239	7.72769	8.59789	8.06267	5.60581	5.84421	6.41983	8.32336	8.31368	8.24583	5.10148	5.2479	5.79564	6.99124	5.66025	7.3001
60	5.64482	5.32487	6.19789	8.45578	8.52009	10.2233	5.93442	5.6142	6.43195	8.12983	8.98506	8.42422	5.85094	6.03649	6.34636	9.16488	9.34304	8.54376	5.39004	5.57126	5.68553	7.2006	5.9883	7.33749
70	5.55866	5.55893	6.15075	8.81948	8.9519	9.94952	6.0329	5.77689	6.40236	8.51446	9.15549	8.79889	6.21797	6.31365	6.3069	9.60619	10.0719	8.61401	5.74087	6.01895	5.71918	7.36665	6.53107	7.50825
80	5.60903	5.94315	6.19522	8.96964	9.09192	8.99315	6.1679	5.97046	6.47331	8.69568	8.7233	8.86553	6.60792	6.62197	6.37728	9.58357	10.0927	8.39256	6.18191	6.46004	5.83004	7.44575	7.07966	7.48595
90	5.86704	6.35797	6.2325	8.66111	8.69949	7.67687	6.28808	6.18445	6.48338	8.41585	7.92741	8.45656	6.97302	6.93586	6.37181	8.84092	9.247	7.78875	6.68034	6.99793	6.0041	7.41996	7.55888	7.18269
100	6.16119	6.7676	6.24276	7.86641	7.75372	6.19238	6.40208	6.31956	6.348	7.63426	6.84342	7.45932	7.14938	7.10497	6.3678	7.75949	7.78489	6.85995	7.0668	7.29894	6.08703	7.14625	7.83292	6.65468
110	6.47863	7.12885	6.17288	6.7401	6.48119	4.62402	6.43277	6.39968	6.09342	6.53741	5.68458	6.28628	7.15632	7.06053	6.18585	6.37551	6.11019	5.81161	7.30677	7.36547	6.09146	6.63916	7.70904	5.86889
120	6.59404	7.20503	5.95816	5.29689	5.11181	3.33717	6.3683	6.29772	5.72615	5.2356	4.52816	5.00497	6.89169	6.77286	5.87047	4.90531	4.50729	4.75524	7.26736	7.17331	5.97169	5.9273	7.03832	4.99433
130	6.47227	6.89963	5.63899	3.97	3.80311	2.34203	6.08643	6.02957	5.23958	3.93995	3.44922	3.77544	6.31909	6.28851	5.37399	3.62673	3.24304	3.79069	6.87985	6.72611	5.68086	5.055	6.06394	4.15823
140	6.05977	6.23329	5.1576	2.82417	2.77572	1.62775	5.63212	5.58964	4.63711	2.85535	2.55306	2.71675	5.55685	5.5343	4.80015	2.5952	2.28961	2.91604	6.21746	5.9785	5.27012	4.09108	4.97914	3.43609
150	5.39678	5.3267	4.54312	1.96224	1.96172	1.15043	5.00613	4.92957	4.02155	1.98041	1.83403	1.8685	4.74392	4.6628	4.2182	1.88735	1.58162	2.18423	5.38812	5.10757	4.72424	3.23626	3.93514	2.74816
160	4.70005	4.33908	3.82947	1.39279	1.37353	0.837488	4.27697	4.19112	3.40439	1.36049	1.29835	1.30199	3.86258	3.80023	3.57478	1.34894	1.15089	1.62415	4.4659	4.17744	4.06654	2.42377	3.0138	2.10585
170	3.85333	3.39024	3.09028	0.999169	0.983096	0.644619	3.52379	3.42569	2.80031	0.956094	0.929004	0.94655	3.05133	2.96858	2.93085	1.00808	0.818808	1.21852	3.5925	3.27115	3.38384	1.80031	2.22709	1.61586
180	3.03971	2.54001	2.42748	0.750591	0.713267	0.512394	2.76826	2.69623	2.23728	0.684157	0.674624	0.703751	2.34396	2.25337	2.31254	0.742464	0.605726	0.900754	2.76464	2.45807	2.70929	1.27631	1.63099	1.2436
190	2.29081	1.83071	1.80899	0.56444	0.544296	0.393023	2.06355	2.06451	1.74731	0.509774	0.505843	0.536338	1.77256	1.67993	1.76824	0.567614	0.470326	0.693315	2.07748	1.79925	2.06133	0.924993	1.16015	0.924307
200	1.66585	1.28258	1.30468	0.426937	0.416527	0.318266	1.49068	1.4972	1.30982	0.391251	0.385048	0.418853	1.28466	1.20025	1.29488	0.440361	0.348838	0.53326	1.49068	1.25813	1.5151	0.658063	0.849181	0.664645
210	1.14383	0.886725	0.909717	0.320638	0.324932	0.249999	1.04015	1.0553	0.974209	0.304102	0.298405	0.334009	0.920012	0.814343	0.916739	0.343234	0.272507	0.410957	1.02504	0.875732	1.08674	0.474258	0.612405	0.47724
220	0.753952	0.60713	0.608733	0.238168	0.251571	0.204782	0.695986	0.707388	0.690844	0.23654	0.230892	0.258964	0.628202	0.553391	0.63286	0.262544	0.217616	0.316646	0.680897	0.586193	0.754551	0.3462	0.447552	0.354518
230	0.482466	0.408223	0.384737	0.178922	0.192369	0.155451	0.447118	0.45763	0.472487	0.188444	0.17939	0.212108	0.409042	0.358042	0.413729	0.199089	0.166843	0.245457	0.420479	0.378168	0.505971	0.242417	0.327346	0.253241
240	0.284961	0.24483	0.237047	0.127038	0.144494	0.126578	0.266035	0.272832	0.313368	0.13427	0.133044	0.15586	0.250092	0.232027	0.251761	0.150872	0.125523	0.177092	0.254832	0.23094	0.305418	0.178514	0.231889	0.179068
250	0.155019	0.142721	0.13054	0.0806552	0.100565	0.0875203	0.149883	0.155358	0.205568	0.100915	0.101749	0.122549	0.141238	0.13458	0.137313	0.107577	0.0910937	0.139014	0.135613	0.130259	0.167307	0.141997	0.193624	0.124541
260	0.00253941	0.0035819	0.00228916	0.00199593	0.00456038	0.00167296	0.00824044	0.0306872	0.110444	0.0182402	0.0516881	0.0927553	0.0124453	0.00240305	0.00601635	0.0328434	0.00350893	0.0562671	0.00216736	0.00206386	0.0114646	0.130692	0.232971	0.0482817
