# Supplementary material for: Live imaging reveals chromatin compaction transitions and dynamic transcriptional bursting during stem cell differentiation in vivo
Source: eLife. 2023 Mar 7;12:e83444. doi: 10.7554/eLife.83444 (PMC10027315; doi:10.7554/eLife.83444)
Supplement: Figure 3—source data 1. [file elife-83444-fig3-data1.xlsx]

## Sheet: Panel A1
	0hrs			1.5hrs			3hrs
0	0.186489	0.205345	0.309636	0.187149	0.26622	0.33705	0.19176	0.230906	0.329856
10	1.39076	1.68457	2.67344	1.45409	2.61066	3.02028	1.48411	2.12407	3.08536
20	3.84679	4.74112	6.18994	4.10899	5.71851	6.13589	4.1352	4.91295	6.49728
30	5.35297	5.61782	7.22329	5.85361	5.54665	6.35227	5.95073	5.06724	6.61853
40	5.53776	5.34144	6.80657	6.11499	5.13407	5.81731	6.21102	4.84584	5.9241
50	5.44636	5.16285	6.218	6.10124	4.86883	5.3041	6.16448	4.81206	5.39311
60	5.54449	5.19175	5.76052	6.15413	4.86008	4.97263	6.2524	4.88516	5.01992
70	5.78017	5.43419	5.42714	6.3195	4.98482	4.79604	6.44921	5.25249	4.75882
80	6.14841	5.92851	5.21063	6.58919	5.34709	4.69387	6.66922	5.7968	4.59667
90	6.53759	6.42729	5.16131	6.82147	5.82062	4.69194	6.94323	6.45708	4.62349
100	6.89265	6.91979	5.14361	6.90524	6.29258	4.75521	6.97525	7.05347	4.71755
110	7.10982	7.16683	5.19399	6.85923	6.68333	4.8581	6.88479	7.36564	4.8285
120	7.04955	7.11387	5.16664	6.57621	6.938	4.99971	6.59406	7.36926	5.00327
130	6.73104	6.8158	5.13379	6.06764	6.87169	5.15238	5.94419	7.04061	5.17764
140	6.06624	6.09978	4.99569	5.37791	6.38726	5.23978	5.22956	6.38203	5.24965
150	5.23635	5.21992	4.74871	4.57671	5.54461	5.21727	4.45046	5.37908	5.23149
160	4.30073	4.25073	4.37122	3.76668	4.58153	5.03413	3.61155	4.31267	4.99747
170	3.30705	3.27961	3.84907	2.96526	3.54417	4.6491	2.85733	3.2735	4.59961
180	2.46868	2.44157	3.21968	2.23445	2.62892	4.06491	2.17667	2.42745	3.97946
190	1.77629	1.71456	2.50232	1.65742	1.85821	3.32262	1.6043	1.71787	3.19244
200	1.21119	1.1705	1.8362	1.19837	1.28936	2.51953	1.153	1.18758	2.38629
210	0.833434	0.794413	1.24424	0.841471	0.876001	1.77659	0.820618	0.805876	1.64637
220	0.554572	0.551123	0.78361	0.564442	0.572866	1.12662	0.545387	0.543859	1.03936
230	0.352641	0.367623	0.456643	0.360732	0.383773	0.654284	0.356662	0.374568	0.617947
240	0.214384	0.224889	0.249202	0.221698	0.244168	0.344833	0.218232	0.240019	0.326874
250	0.121551	0.13213	0.123418	0.119848	0.144173	0.162131	0.124104	0.140088	0.157593
260	0.00205693	0.00197285	0.00148509	0.00231606	0.00178714	0.00141185	0.00248343	0.00183381	0.0013377

## Sheet: Panel B1
	0hrs			1.5hrs			3hrs
0	0.30978	0.289713	0.329807	0.296319	0.343741	0.397229	0.279764	0.325291	0.394451
10	3.35379	3.03776	3.01151	3.21414	3.91741	3.81545	2.84022	3.47628	3.73176
20	7.28297	6.56118	6.36427	7.21204	6.77547	6.92076	6.70689	6.56358	6.93413
30	7.59552	7.19488	7.18734	7.83232	6.69808	6.6013	7.77485	6.93383	6.7576
40	7.17471	7.25197	6.85549	7.54608	6.58902	5.88668	7.74586	7.05323	6.00415
50	7.22133	7.35787	6.29848	7.56801	6.79573	5.35091	7.82777	7.46053	5.46036
60	7.53158	7.50921	5.79049	7.79251	7.12617	4.97755	8.03243	7.83872	5.04249
70	7.94727	7.7152	5.48547	8.03821	7.47694	4.77152	8.18414	8.19144	4.84498
80	8.15937	7.78374	5.3381	8.17761	7.62996	4.66708	8.1729	8.18837	4.72536
90	8.17368	7.65119	5.24217	7.9359	7.54227	4.68113	7.93335	7.83643	4.70514
100	7.68437	7.3897	5.25017	7.3026	7.23061	4.82059	7.29049	7.25147	4.80083
110	6.81001	6.67685	5.26453	6.38238	6.66726	4.95694	6.37785	6.40379	4.97575
120	5.6542	5.71863	5.27367	5.32439	5.80839	5.09984	5.38063	5.41647	5.14622
130	4.41329	4.60633	5.20709	4.22205	4.83781	5.25867	4.25274	4.42397	5.28742
140	3.27157	3.54617	5.00265	3.22728	3.89078	5.349	3.21737	3.42369	5.29516
150	2.28543	2.67075	4.73132	2.36771	2.99509	5.2715	2.3211	2.52084	5.18
160	1.5715	1.91836	4.2605	1.66287	2.2183	4.93537	1.66405	1.82482	4.90218
170	1.07611	1.43107	3.66475	1.15795	1.57782	4.44457	1.19401	1.30904	4.36613
180	0.727447	1.05089	2.97732	0.820397	1.1115	3.71114	0.840488	0.948438	3.63416
190	0.518217	0.779023	2.27687	0.577159	0.806715	2.89848	0.600519	0.716618	2.79743
200	0.374759	0.58672	1.64072	0.416924	0.621859	2.07048	0.427929	0.557391	1.99109
210	0.279214	0.442279	1.10617	0.308295	0.4649	1.37503	0.31706	0.447846	1.31446
220	0.215272	0.330555	0.689007	0.232878	0.337488	0.835305	0.234333	0.329206	0.805902
230	0.163198	0.234853	0.406558	0.173929	0.251587	0.487077	0.17167	0.256779	0.482349
240	0.124463	0.159821	0.225769	0.123908	0.173971	0.27355	0.123654	0.183965	0.274967
250	0.0794843	0.103623	0.118265	0.0845314	0.10963	0.141609	0.0862507	0.116603	0.144366
260	0.00146151	0.00165928	0.00152709	0.00160523	0.00148602	0.00122354	0.00167395	0.00137451	0.00114289

## Sheet: Panel D
Day 1	Day 2	Day 3	Day 4
1.35	1.01	5.26	8.12
0	0	0	0
1.72	1.5	2.06	2.08
2	4	7.73
0	0	0	0
0	0.5	5.66	9.5
0	0	3.5	6.92
0	0	0.5	1.28
1	0.5	3	4.68
0	0	0	0
0	0	0
1	0	0.24
0.5	1.57	5.35	9.82
0	0.5	4.01	8
0	0	0	0
1.5	2.81	5.81	9
0	0	0
3.53	6.41	11.22	13.87
0.51	0.08	1.52	2.54
1.5	0.29	0.5	1
0	0	0	0.87
1.5	2	8	10.92
0	0	2.25	6.85
0	0	0	1
0.5	0	0.5	1.33
1.54	5.14	9.3
0	0	0	0
0	0	2.5	5.77
0	0	0.99	0.61
0	0	0
1	2	4	8.5
1.15	1	4.51	9.51
0.5	0.87	0.5
3.05	4.72	6.08	9.49
0	0	0
0.71	1.13	1.11	1.24
0	0.5	2.29	2.55
0	0	0
0.5	0.5	1.5	1
0	0	0
0	1	0.5	1
1.68	1.7	6.59	10.72
1	1.5	2.01	4.06
1	0.5	0.71	0.5
3.04	5.51	10.37	12.5
0	0	0.25
0	0	0	0
0	0	3	5.5
3.29	5.79	8.75	18.87
0	0.11	3.02	1.5
0.5	1	3	0
0	0	1	0
0	0
4.25	5.8	10.41	12.01
5.5	8.02	12.01
3.25	4.57	7.71	7.93
1	0	0.5	1.12
5.5	9.08	13.85	16.18
5.42	8	11.51
1.15	1.78	2	6
0.48	1.02	0.64	1.15
0	0	0.34	1
0	0	0.5	1
0	0	0	1.05
0	0	0	1.13
0	0
0	0	0	0
0	0	2.03	2.56
0	0	0	1
0.55	1.02	2.15	2.96
0.11	0	1.81	2.62
0	0	0	0
0.18	0.5	3.02	4.05
0	0	0	0
0	0	0	1.04
0	0	1	2
0	0	0	0
0.32	0	0	0
0.5	0.88	0.85	2.2
1	0	1.03	1.19
0	0	0	0.23
0	0	0.5	0.34
0	0	0	0
0	0	0	0
3.05	3.25	5.73	5.12
0.5	0	3.58	5
1	0.82	0	1
1.19	1.57	2.56	3.5
0	2.22	4	5.74
0	0.08	1	0

## Sheet: Panel E
	<5um			5-10um			>10um
0	0.337423	0.30417	0.326905	0.382479	0.367574	0.227519	0.328281	0.372076
10	2.7672	2.68069	3.19693	3.7546	3.33898	2.65925	4.13172	4.08169
20	5.34954	5.39786	6.31214	6.31972	6.15218	6.54663	7.68258	7.31784
30	5.45878	5.69947	6.50001	6.31482	6.17329	6.95386	8.17922	8.09662
40	5.18525	5.49679	6.04676	6.54919	6.40436	6.94269	9.0194	8.8533
50	4.96521	5.44666	5.64911	7.08955	6.92008	6.66574	9.52645	9.5361
60	4.98764	5.52357	5.40707	7.70935	7.68641	7.06643	9.9301	9.60533
70	5.20963	5.76251	5.28003	8.38586	8.1953	7.95727	10.1739	9.41714
80	5.55001	6.0843	5.26645	8.76531	8.56899	8.52598	9.68248	8.71988
90	5.99162	6.46921	5.36276	8.52444	8.55348	8.97098	8.68743	7.40824
100	6.45361	6.72776	5.42993	7.92098	8.13533	8.81696	6.93764	6.20955
110	6.73168	6.7669	5.52502	6.91695	7.09694	7.89963	4.77415	4.97932
120	6.83002	6.58908	5.61377	5.71116	5.79087	6.1938	3.07207	3.79408
130	6.66097	6.18104	5.54916	4.45292	4.60621	4.66458	1.89111	2.88024
140	6.13109	5.52006	5.3438	3.19694	3.41056	3.20471	1.33534	2.16455
150	5.29968	4.73657	4.96008	2.19361	2.39403	2.15958	0.915138	1.59676
160	4.37363	3.93281	4.45426	1.53135	1.68902	1.40565	0.724491	1.21908
170	3.50757	3.11165	3.78243	1.1223	1.24799	0.82885	0.640132	0.948968
180	2.63581	2.35009	3.06769	0.829926	0.909093	0.611004	0.542284	0.699499
190	1.9063	1.73607	2.34528	0.636071	0.680201	0.45231	0.450069	0.587441
200	1.33343	1.24997	1.71177	0.505767	0.508364	0.355562	0.376128	0.465883
210	0.910603	0.873405	1.181	0.403965	0.392101	0.269444	0.327181	0.353229
220	0.619157	0.588189	0.777065	0.307117	0.300521	0.220399	0.246705	0.277
230	0.406182	0.38842	0.480012	0.217541	0.227893	0.180762	0.181461	0.185549
240	0.253441	0.242148	0.281111	0.149614	0.148684	0.1276	0.140128	0.1392
250	0.142602	0.138727	0.147426	0.106883	0.0997087	0.0910576	0.102885	0.0898805
260	0.00191827	0.0018827	0.00202446	0.00159324	0.00183753	0.00176455	0.00154833	0.0015607
