# Supplementary material for: Live imaging reveals chromatin compaction transitions and dynamic transcriptional bursting during stem cell differentiation in vivo
Source: eLife. 2023 Mar 7;12:e83444. doi: 10.7554/eLife.83444 (PMC10027315; doi:10.7554/eLife.83444)
Supplement: Figure 4—source data 1. [file elife-83444-fig4-data1.xlsx]

## Sheet: Panel C
	K10 Negative									K10 Positive
0	0.170787	0.199819	0.190826	0.168185	0.224945	0.199945	0.172636	0.200505	0.194998	0.210135	0.240796	0.171575	0.202532	0.236474	0.199849	0.206881	0.210169	0.224706
10	1.16355	1.41032	1.4953	1.11264	1.8124	1.53051	1.2794	1.75143	1.48446	1.79692	2.37328	1.38279	1.68991	2.03352	1.50762	1.93825	1.90598	2.02328
20	3.40502	4.13862	4.13448	3.36627	5.54917	4.43024	3.69992	4.71542	3.98755	4.90068	5.63649	4.08479	4.50772	5.38316	4.15538	5.10789	4.96174	5.60072
30	4.9255	5.47031	5.46789	4.91169	6.40547	6.06694	5.45644	6.03491	5.77215	6.21454	6.60605	5.86284	5.73988	6.4875	5.77175	6.36547	6.16188	7.63263
40	5.09374	5.45021	5.40942	5.13144	5.68594	6.13046	5.87862	6.14015	6.36901	6.20583	6.50637	6.25922	5.94871	6.6606	6.31843	6.24185	6.39581	8.01242
50	5.09647	5.40546	5.30816	5.11986	5.25661	5.97991	5.94356	6.0657	6.60726	6.26479	6.37219	6.55206	6.26405	6.70981	6.73374	6.50049	6.60979	8.1576
60	5.33285	5.46367	5.38597	5.13908	5.09033	6.00465	6.15571	6.16946	6.70261	6.51696	6.43751	6.79947	6.65029	7.11165	7.17345	6.89089	6.9799	8.27986
70	5.70218	5.76494	5.6199	5.30635	4.97228	6.09012	6.30985	6.35984	6.69573	6.74643	6.68544	7.04141	7.09666	7.41344	7.53642	7.54042	7.17848	8.19732
80	6.13474	6.04717	5.82286	5.67981	4.86552	6.27662	6.5038	6.5724	6.62821	6.98924	6.95402	7.18594	7.37772	7.55134	7.74287	7.75974	7.49993	8.11075
90	6.77631	6.43913	6.14775	6.15615	4.96522	6.55622	6.79151	6.91177	6.63081	7.14786	7.10629	7.13903	7.84495	7.56316	8.05238	7.86826	7.47186	7.79634
100	7.30882	6.75877	6.51886	6.56112	5.27756	6.6618	6.9685	7.15985	6.54325	7.17711	7.13291	6.98677	7.92963	7.19919	7.84172	7.7794	7.21376	7.16105
110	7.51687	7.01174	6.7626	6.95369	5.64375	6.65754	6.92364	7.08113	6.40711	6.96584	6.90626	6.69157	7.71442	6.58853	7.6032	7.28538	6.75553	6.26867
120	7.51962	7.06689	6.75411	7.0299	6.00149	6.59732	6.68719	6.72133	6.23914	6.47703	6.5939	6.33572	6.94993	5.94184	6.77185	6.52771	6.10791	5.25677
130	6.99599	6.69284	6.38361	6.9304	6.2839	6.22114	6.26408	6.05611	5.82806	5.73637	5.84826	5.73452	5.99159	5.40505	5.78313	5.68792	5.41989	4.31675
140	6.20239	6.13052	5.83988	6.39768	6.2664	5.58349	5.62095	5.21254	5.28814	4.90204	4.94776	5.04328	4.87342	4.6373	4.64362	4.52203	4.61942	3.30675
150	5.3237	5.38012	5.1931	5.67903	5.86519	4.80068	4.83894	4.3154	4.58095	4.13173	3.89372	4.2005	3.71709	3.74233	3.51719	3.40927	3.73725	2.53845
160	4.26079	4.33703	4.38866	4.83575	5.21841	3.90385	3.9442	3.39361	3.75547	3.28636	2.92403	3.43234	2.75388	2.92489	2.52488	2.50737	2.95425	1.91118
170	3.29721	3.3135	3.58085	3.89407	4.33401	3.10591	3.07194	2.63086	2.99829	2.52035	2.12107	2.6902	2.02284	2.09971	1.84213	1.80748	2.245	1.41898
180	2.48943	2.3845	2.90537	3.00383	3.39059	2.32231	2.31408	2.02663	2.24493	1.86452	1.47587	1.98667	1.42762	1.40371	1.32743	1.25901	1.63506	1.09585
190	1.79268	1.69125	2.21339	2.26961	2.49777	1.67446	1.68348	1.47194	1.68718	1.34839	1.02536	1.46779	1.06652	0.957883	0.929159	0.890015	1.23357	0.827837
200	1.24438	1.2262	1.61331	1.61694	1.69209	1.17339	1.22511	1.05305	1.20285	0.931396	0.737272	1.05976	0.754736	0.661695	0.66692	0.621091	0.881495	0.619217
210	0.847396	0.877633	1.14459	1.10805	1.12424	0.804092	0.852687	0.739534	0.84173	0.623635	0.523654	0.728448	0.534256	0.480869	0.488022	0.459336	0.645163	0.44972
220	0.590248	0.583842	0.772679	0.724106	0.730412	0.526772	0.61104	0.508904	0.577598	0.441402	0.372417	0.506386	0.368966	0.337442	0.346683	0.328439	0.46783	0.330701
230	0.405082	0.379907	0.503147	0.465785	0.450845	0.352089	0.407317	0.340194	0.372798	0.294742	0.275428	0.323462	0.256038	0.221403	0.24247	0.230576	0.330987	0.218904
240	0.247479	0.242675	0.287901	0.280143	0.251989	0.222913	0.248902	0.232501	0.231143	0.194073	0.187919	0.20868	0.189113	0.146829	0.171815	0.150293	0.228369	0.149315
250	0.154291	0.130204	0.15325	0.155788	0.141394	0.124082	0.143561	0.132014	0.125931	0.109492	0.113458	0.122218	0.125387	0.098793	0.105547	0.112581	0.146743	0.091696
260	0.002469	0.002719	0.002124	0.002616	0.002074	0.002566	0.002927	0.002792	0.002657	0.002141	0.002283	0.002545	0.002151	0.001878	0.002326	0.001939	0.002232	0.002524

## Sheet: Panel D
PHATE/X	PHATE/Y	Cluster
-39.5012	12.6098	1
-29.9777	6.46908	1
-38.5782	12.8957	1
-38.3514	4.99282	1
-38.8373	12.74	1
-34.2693	3.29702	1
-39.1421	0.775685	1
-41.9764	9.46616	1
-34.5498	15.3071	1
-42.1641	10.0686	1
-13.0004	4.14433	1
-20.3397	10.3811	1
-26.4047	11.4119	1
-36.3206	3.86937	1
-33.5801	20.0176	1
-27.7603	13.4983	1
-35.9121	22.3911	1
-29.0342	14.713	1
-35.1386	21.9078	1
-20.4251	9.58318	1
-29.3857	15.9952	1
-36.6679	21.3288	1
-35.8497	17.2471	1
-22.5559	9.69845	1
-37.6878	10.1138	1
-36.1771	21.9888	1
-22.3691	8.54731	1
-28.6262	-0.762185	1
-21.3813	7.88829	1
-14.566	3.67674	1
-29.7122	-0.300195	1
-11.5359	6.12255	1
-22.5593	-2.02876	1
-38.6786	4.00672	1
-13.5846	8.28614	1
-39.0896	8.86173	1
-28.0982	12.7876	1
-25.247	12.7751	1
-31.3976	13.7126	1
-22.3889	6.82455	1
-19.6543	8.19889	1
-36.1426	3.83655	1
-40.3685	7.07165	1
-28.1548	-1.57079	1
-13.2501	5.03343	1
-39.4235	-0.290487	1
-36.5152	5.88931	1
-27.2479	9.55171	1
-27.3732	7.37109	1
-9.50517	3.4729	2
-9.31364	4.52836	2
-12.0049	6.89617	2
0.238609	2.20723	2
7.23371	5.13176	2
-12.0927	4.16671	2
-5.84887	3.12077	2
-3.05712	3.52631	2
0.053652	-1.5071	2
-6.93332	3.25655	2
-7.30784	1.3571	2
-3.91118	3.9688	2
4.55935	3.05506	2
2.86511	3.66458	2
3.23461	3.80876	2
-1.97746	-9.76044	2
-12.3893	3.17768	2
7.00725	5.04083	2
3.09879	4.50194	2
-6.9962	1.08437	2
8.33235	5.83885	2
1.56078	-0.425596	2
-4.42828	8.31604	2
-5.61216	2.99753	2
-6.2758	2.64943	2
-8.92214	-1.28797	2
-15.0832	3.72139	2
-10.4495	4.16364	2
6.83765	5.58105	2
-15.5084	-15.2569	3
-19.5853	-10.3606	3
-12.2663	-15.9788	3
-10.4887	-17.3276	3
0.543758	-20.4102	3
-30.7344	-8.21265	3
-33.5179	-7.44167	3
-35.5886	-5.93455	3
-7.99317	-18.0401	3
-13.1997	-14.5186	3
-2.05915	-17.3368	3
0.807128	-20.2454	3
-11.5004	-12.3097	3
10.957	-19.6497	3
6.86287	-20.5883	3
-31.8223	-6.92158	3
-20.1677	-12.8486	3
-19.3702	-12.1797	3
-7.92888	-10.7684	3
-7.12073	-18.2419	3
-39.3315	-0.0145007	3
-11.7332	-16.1874	3
-19.5138	-12.6034	3
-15.9577	-11.5037	3
-2.60778	-19.6842	3
0.544771	-18.3806	3
-13.1498	-7.58016	3
-14.1759	-7.93254	3
-23.1288	-11.9208	3
-11.6456	-15.3753	3
6.12144	-20.1812	3
-22.6957	-11.9173	3
-36.5321	-4.65573	3
-8.3437	-10.5191	3
-11.7384	-10.8231	3
-36.5716	-2.41374	3
-22.1505	-12.2623	3
0.0933943	-20.0531	3
1.33509	-20.098	3
2.75522	-19.7423	3
7.46491	-9.8393	4
26.5965	-9.65539	4
14.8607	-9.35352	4
8.81254	-10.8888	4
20.1193	5.3018	4
10.6139	6.50257	4
18.7295	6.76652	4
18.7279	6.53168	4
16.1428	-17.4146	4
2.61864	-4.9984	4
17.3682	6.93983	4
16.8098	6.52893	4
19.5998	3.47986	4
20.5168	-9.21983	4
10.8595	-12.9877	4
15.8805	6.8334	4
19.3623	4.79199	4
19.3208	5.06516	4
9.34588	-11.5684	4
19.3691	3.73338	4
18.7731	-9.50393	4
19.8469	-10.8661	4
5.71884	-11.038	4
21.5403	-10.0559	4
14.2256	7.06543	4
18.0589	-1.40804	4
20.1227	4.92226	4
23.9625	5.3239	4
5.91615	-9.42084	4
8.017	-19.8047	4
8.63898	5.75674	4
23.903	-10.4276	4
29.4684	-8.8333	4
34.7494	-6.06599	4
16.7775	-18.7449	4
15.4304	-19.3752	4
5.11252	-15.0717	4
7.94649	-18.6303	4
25.8537	-10.7073	4
11.0272	-6.39612	4
14.1051	-18.8309	4
10.5241	-12.0761	4
16.5617	-10.1965	4
17.9303	-13.3741	4
17.7131	-10.0714	4
10.2726	-18.0567	4
7.39728	-10.1511	4
20.2619	-14.5548	4
19.4171	3.98036	4
49.6167	15.4808	5
34.3989	4.37252	5
26.9567	3.46903	5
35.3559	-5.18613	5
28.2767	6.09662	5
49.9955	18.6651	5
46.8567	19.092	5
40.2267	6.67254	5
39.7959	1.21458	5
40.4797	-2.12781	5
51.1952	19.3106	5
45.4832	14.6026	5
47.8644	15.4507	5
48.6481	10.0774	5
43.6094	11.0577	5
49.8451	19.3899	5
48.8435	20.4088	5
39.5	1.90644	5
48.0286	13.1647	5
41.6784	-1.31552	5
49.8485	17.3029	5
39.8157	4.06457	5
45.1139	17.9017	5
47.2867	14.9362	5
41.2836	14.4505	5
34.1129	8.22628	5
38.322	4.73604	5
43.5282	3.32744	5
42.3681	0.517424	5
49.1449	12.6606	5
36.2747	9.90348	5

## Sheet: Panel D1
	Cluster 1	Cluster 2	Cluster 3	Cluster 4	Cluster 5
0	0.192076	0.217075	0.160763	0.196308	0.246152
10	1.3456	1.91377	1.09906	1.64325	2.27017
20	4.13589	5.4965	3.08	4.50441	5.7719
30	5.47128	6.58665	4.78833	6.01895	7.43952
40	5.28862	6.21726	5.22952	6.26971	8.19015
50	4.98856	5.866	5.35781	6.41015	8.84467
60	4.819	5.73664	5.53871	6.66135	9.54497
70	4.76826	5.70413	5.80305	7.00231	9.7427
80	4.80993	5.80615	6.22506	7.38819	9.40748
90	5.07516	6.07629	6.84104	7.77071	8.5856
100	5.42178	6.33942	7.36454	7.87033	7.28415
110	5.85219	6.50605	7.67297	7.61841	5.81103
120	6.27974	6.555	7.60018	6.93333	4.41493
130	6.63361	6.33189	7.177	5.91869	3.3191
140	6.6582	5.72085	6.32845	4.76776	2.41123
150	6.32965	4.85696	5.27262	3.65354	1.7475
160	5.65317	3.91426	4.13728	2.70406	1.29118
170	4.74232	3.01506	3.15302	1.9691	0.950311
180	3.71959	2.23304	2.29577	1.42482	0.705412
190	2.78452	1.6423	1.62374	1.03238	0.548014
200	1.93924	1.18191	1.14111	0.733636	0.426479
210	1.2933	0.802046	0.815673	0.529532	0.343876
220	0.838293	0.550025	0.544997	0.394726	0.261797
230	0.509723	0.362752	0.377309	0.273834	0.193687
240	0.292277	0.231822	0.234116	0.190158	0.144432
250	0.155499	0.133908	0.135294	0.117713	0.101279
260	0.00252306	0.00222948	0.00257684	0.0026433	0.00227259

## Sheet: Panel E
K10 negative				K10 positive
PHATE/X	PHATE/Y	Cluster		PHATE/X	PHATE/Y	Cluster
-39.5012	12.6098	1		-39.4235	-0.290487	1
-29.9777	6.46908	1		-36.5152	5.88931	1
-38.5782	12.8957	1		-27.2479	9.55171	1
-38.3514	4.99282	1		-27.3732	7.37109	1
-38.8373	12.74	1		-5.61216	2.99753	2
-34.2693	3.29702	1		-6.2758	2.64943	2
-39.1421	0.775685	1		-8.92214	-1.28797	2
-41.9764	9.46616	1		-15.0832	3.72139	2
-34.5498	15.3071	1		-10.4495	4.16364	2
-42.1641	10.0686	1		6.83765	5.58105	2
-13.0004	4.14433	1		-22.6957	-11.9173	3
-20.3397	10.3811	1		-36.5321	-4.65573	3
-26.4047	11.4119	1		-8.3437	-10.5191	3
-36.3206	3.86937	1		-11.7384	-10.8231	3
-33.5801	20.0176	1		-36.5716	-2.41374	3
-27.7603	13.4983	1		-22.1505	-12.2623	3
-35.9121	22.3911	1		0.0933943	-20.0531	3
-29.0342	14.713	1		1.33509	-20.098	3
-35.1386	21.9078	1		2.75522	-19.7423	3
-20.4251	9.58318	1		8.017	-19.8047	4
-29.3857	15.9952	1		8.63898	5.75674	4
-36.6679	21.3288	1		23.903	-10.4276	4
-35.8497	17.2471	1		29.4684	-8.8333	4
-22.5559	9.69845	1		34.7494	-6.06599	4
-37.6878	10.1138	1		16.7775	-18.7449	4
-36.1771	21.9888	1		15.4304	-19.3752	4
-22.3691	8.54731	1		5.11252	-15.0717	4
-28.6262	-0.762185	1		7.94649	-18.6303	4
-21.3813	7.88829	1		25.8537	-10.7073	4
-14.566	3.67674	1		11.0272	-6.39612	4
-29.7122	-0.300195	1		14.1051	-18.8309	4
-11.5359	6.12255	1		10.5241	-12.0761	4
-22.5593	-2.02876	1		16.5617	-10.1965	4
-38.6786	4.00672	1		17.9303	-13.3741	4
-13.5846	8.28614	1		17.7131	-10.0714	4
-39.0896	8.86173	1		10.2726	-18.0567	4
-28.0982	12.7876	1		7.39728	-10.1511	4
-25.247	12.7751	1		20.2619	-14.5548	4
-31.3976	13.7126	1		19.4171	3.98036	4
-22.3889	6.82455	1		39.7959	1.21458	5
-19.6543	8.19889	1		40.4797	-2.12781	5
-36.1426	3.83655	1		51.1952	19.3106	5
-40.3685	7.07165	1		45.4832	14.6026	5
-28.1548	-1.57079	1		47.8644	15.4507	5
-13.2501	5.03343	1		48.6481	10.0774	5
-9.50517	3.4729	2		43.6094	11.0577	5
-9.31364	4.52836	2		49.8451	19.3899	5
-12.0049	6.89617	2		48.8435	20.4088	5
0.238609	2.20723	2		39.5	1.90644	5
7.23371	5.13176	2		48.0286	13.1647	5
-12.0927	4.16671	2		41.6784	-1.31552	5
-5.84887	3.12077	2		49.8485	17.3029	5
-3.05712	3.52631	2		39.8157	4.06457	5
0.053652	-1.5071	2		45.1139	17.9017	5
-6.93332	3.25655	2		47.2867	14.9362	5
-7.30784	1.3571	2		41.2836	14.4505	5
-3.91118	3.9688	2		34.1129	8.22628	5
4.55935	3.05506	2		38.322	4.73604	5
2.86511	3.66458	2		43.5282	3.32744	5
3.23461	3.80876	2		42.3681	0.517424	5
-1.97746	-9.76044	2		49.1449	12.6606	5
-12.3893	3.17768	2		36.2747	9.90348	5
7.00725	5.04083	2
3.09879	4.50194	2
-6.9962	1.08437	2
8.33235	5.83885	2
1.56078	-0.425596	2
-4.42828	8.31604	2
-15.5084	-15.2569	3
-19.5853	-10.3606	3
-12.2663	-15.9788	3
-10.4887	-17.3276	3
0.543758	-20.4102	3
-30.7344	-8.21265	3
-33.5179	-7.44167	3
-35.5886	-5.93455	3
-7.99317	-18.0401	3
-13.1997	-14.5186	3
-2.05915	-17.3368	3
0.807128	-20.2454	3
-11.5004	-12.3097	3
10.957	-19.6497	3
6.86287	-20.5883	3
-31.8223	-6.92158	3
-20.1677	-12.8486	3
-19.3702	-12.1797	3
-7.92888	-10.7684	3
-7.12073	-18.2419	3
-39.3315	-0.0145007	3
-11.7332	-16.1874	3
-19.5138	-12.6034	3
-15.9577	-11.5037	3
-2.60778	-19.6842	3
0.544771	-18.3806	3
-13.1498	-7.58016	3
-14.1759	-7.93254	3
-23.1288	-11.9208	3
-11.6456	-15.3753	3
6.12144	-20.1812	3
7.46491	-9.8393	4
26.5965	-9.65539	4
14.8607	-9.35352	4
8.81254	-10.8888	4
20.1193	5.3018	4
10.6139	6.50257	4
18.7295	6.76652	4
18.7279	6.53168	4
16.1428	-17.4146	4
2.61864	-4.9984	4
17.3682	6.93983	4
16.8098	6.52893	4
19.5998	3.47986	4
20.5168	-9.21983	4
10.8595	-12.9877	4
15.8805	6.8334	4
19.3623	4.79199	4
19.3208	5.06516	4
9.34588	-11.5684	4
19.3691	3.73338	4
18.7731	-9.50393	4
19.8469	-10.8661	4
5.71884	-11.038	4
21.5403	-10.0559	4
14.2256	7.06543	4
18.0589	-1.40804	4
20.1227	4.92226	4
23.9625	5.3239	4
5.91615	-9.42084	4
49.6167	15.4808	5
34.3989	4.37252	5
26.9567	3.46903	5
35.3559	-5.18613	5
28.2767	6.09662	5
49.9955	18.6651	5
46.8567	19.092	5
40.2267	6.67254	5
		2.5			3.83871

## Sheet: Panel E1
	K10+in cluster	# in cluster	%K10+
1	4	49	8.16327
2	6	29	20.6897
3	9	40	22.5
4	20	49	40.8163
5	23	31	74.1935
