# Supplementary material for: Live imaging reveals chromatin compaction transitions and dynamic transcriptional bursting during stem cell differentiation in vivo
Source: eLife. 2023 Mar 7;12:e83444. doi: 10.7554/eLife.83444 (PMC10027315; doi:10.7554/eLife.83444)
Supplement: Figure 5—source data 1. [file elife-83444-fig5-data1.xlsx]

## Sheet: Panel D
	H2B			MS2
0	0.00700542	0.00338682	0.00650938	0	0	0
10	0.0170827	0.0100854	0.0167383	0	0	0
20	0.0237943	0.0183717	0.0271285	0	0	0
30	0.0323929	0.030789	0.0430537	0	0	0
40	0.0421416	0.0429739	0.053692	0	0	0
50	0.0480617	0.0522192	0.0571299	0.00145773	0.00655978	0.0018116
60	0.0518805	0.0565538	0.0572894	0.000583082	0.00218659	0.00724638
70	0.053258	0.0573893	0.0544983	0.00640465	0.00776288	0.00724638
80	0.0541976	0.058566	0.0524224	0.0195688	0.0265473	0.00375906
90	0.0556071	0.059319	0.0505359	0.0331899	0.0408956	0.0103147
100	0.0578339	0.0611503	0.0515366	0.055767	0.0686045	0.0296759
110	0.0607345	0.0637348	0.0520701	0.065581	0.0969524	0.0447425
120	0.0641315	0.0655035	0.0567736	0.10155	0.132013	0.0834944
130	0.0677267	0.0669632	0.0592737	0.126782	0.1459	0.104901
140	0.0689389	0.0668788	0.0608384	0.140587	0.140529	0.0942254
150	0.0677084	0.0648073	0.0609693	0.143454	0.107129	0.135233
160	0.0603952	0.0590257	0.0578783	0.119375	0.0779468	0.127192
170	0.049475	0.0494438	0.0514002	0.0985935	0.0670035	0.0998304
180	0.0380481	0.0379297	0.0422161	0.0466908	0.0385408	0.0877169
190	0.0280594	0.0278628	0.0320679	0.0202504	0.018003	0.0844828
200	0.0189409	0.0189968	0.023129	0.00997145	0.0115886	0.0351601
210	0.0130326	0.0119757	0.0147312	0.00424361	0.00724586	0.0214825
220	0.0082977	0.00731804	0.00893726	0.00383392	0.00397294	0.0165616
230	0.00524706	0.00444856	0.00481612	0.0016179	0.000618429	0.00382694
240	0.00325936	0.00243488	0.00253504	0.000497755	0	0.0010965
250	0.00274878	0.00187194	0.00182982	0	0	0

## Sheet: Panel E
K10MS2+ % in region
15.32
7.91
18.6
21.82
13.14
16.3

## Sheet: Panel F
K10MS2 ON			K10MS2 Dynamic
27	63	38	67	27	99

## Sheet: Panel H
		Day 2
		ON	DYNAMIC	OFF
Day 1	ON	0.439655	0.474138	0.086207
	DYNAMIC	0.217877	0.558659	0.223464

## Sheet: Panel I
	K10MS2-				K10MS2+
0	1.03445	0.554756	0.254642		0.407653	0.244994	0.388947
10	4.70156	2.28441	1.11529		1.64524	1.05719	1.61406
20	5.79596	3.10331	1.81159		2.32566	2.01164	2.64677
30	6.61462	4.49208	2.62058		3.16272	3.30568	4.21501
40	6.43264	5.88748	3.77311		4.11535	4.59526	5.33342
50	5.6115	6.02053	5.05077		4.85752	5.33826	5.64232
60	4.87183	5.66473	5.62728		5.23766	5.5983	5.63854
70	4.35082	5.27862	5.67237		5.27802	5.67401	5.35278
80	4.10489	5.05649	5.65223		5.40285	5.68137	5.11717
90	3.82137	4.8566	5.49695		5.43087	5.75137	4.96833
100	3.70023	4.74121	5.5486		5.6705	5.92338	5.01023
110	3.7181	4.78871	5.61188		5.81693	6.08142	5.0534
120	3.78648	5.02958	5.56524		6.1412	6.28752	5.48231
130	4.07502	5.27797	5.68556		6.41977	6.45076	5.75279
140	4.50052	5.48261	5.82154		6.63637	6.45283	5.88147
150	4.89741	5.66661	5.86631		6.6315	6.32273	6.03317
160	5.2615	5.58992	5.8882		6.05021	5.85264	5.90275
170	5.22723	5.21449	5.50708		5.23336	5.01314	5.26739
180	4.92619	4.58931	5.00228		4.11415	4.01593	4.56208
190	4.1911	3.72565	4.15972		3.13772	2.94654	3.55127
200	3.21389	2.66712	3.15525		2.28712	2.12657	2.58764
210	2.24752	1.78555	2.26081		1.56484	1.35898	1.7703
220	1.40616	1.08204	1.41357		1.05183	0.866103	1.10127
230	0.837789	0.629539	0.835079		0.660919	0.545789	0.615409
240	0.437877	0.347295	0.414927		0.412323	0.315917	0.335269
250	0.219413	0.168719	0.171748		0.249614	0.16511	0.161286
260	0.0139291	0.0146624	0.0173886		0.0581161	0.0165785	0.0146158

## Sheet: Panel I1
K10MS2-			K10MS2+
-23.7026	4.87474		6.31626	3.67327
-48.6044	6.00296		-54.3276	16.0053
-44.3764	-1.88841		10.4314	10.7887
-3.46624	9.90043		-21.3912	7.41358
-52.5504	7.51846		29.8986	-0.783555
-46.9647	14.8544		-26.0684	6.37627
-29.8282	-5.83352		-22.8466	-2.26306
-31.0094	-0.1163		-3.46121	10.6576
-46.6286	14.8536		2.95648	-11.7899
-42.5359	9.30076		-35.8427	4.39456
3.26027	-12.0721		5.72189	3.85731
-10.8723	2.30943		43.37	18.8007
-52.1844	16.8863		42.5218	-7.34958
-44.6986	13.7624		33.2418	-9.36581
-48.7584	8.58229		39.3899	19.0591
-28.9551	8.63015		50.2669	9.68567
-54.3374	18.0923		46.7779	15.86
-39.1418	2.20368		6.77982	6.8746
-10.8587	-14.7915		30.6308	-9.54479
-48.6387	4.11445		56.0909	2.65727
-27.6508	2.72287		54.3003	1.14645
-49.8004	7.25068		-1.37691	-11.0225
-51.8264	11.6863		-2.59406	11.5888
-32.6057	12.8069		-5.1672	11.2106
-31.7977	-8.19529		28.3433	-13.0604
-28.6635	-8.0282		37.8757	19.8695
-48.5625	1.0127		-33.438	-3.73593
-46.8172	-0.904594		54.1004	0.313897
-19.3915	-3.43075		-33.8069	1.54672
-30.1903	12.8067		-25.2216	0.460535
-43.9627	-2.8367		48.9629	-2.6512
-55.7379	17.8643		28.7019	2.60248
-36.2644	-0.272281		-7.10309	-11.2844
-30.3065	-6.90828		21.5627	-10.5648
-28.6349	-2.92005		-5.77309	-14.9503
-34.0685	0.273888		-7.49577	11.148
-9.7067	10.9217		28.9676	-3.84741
-49.1443	1.80041		7.45702	6.85097
-14.8439	-13.1984		15.4656	12.0208
-28.5587	-8.16096		-35.2076	-2.54651
-20.327	-11.7815		42.0755	20.791
-47.6226	12.8491		-2.41204	-5.56649
-9.82242	-6.0257		20.8188	16.8122
-18.5627	10.8908		56.0353	1.08179
-53.1905	15.7347		31.1957	0.815195
-55.5313	14.7981		-26.3914	-7.27672
-7.00157	-4.60691		29.9227	-17.8784
-42.606	14.2467		30.6918	21.0914
-23.1223	-2.59644		29.0116	-17.8377
-26.4036	-9.92939		13.1114	-12.1904
19.0453	-11.7122		-9.87879	1.63084
0.906739	-6.30704		20.1328	-13.1021
3.95985	-11.8706		34.1023	4.08778
-14.9596	-10.2742		14.7076	12.0423
-4.83433	11.3075		-28.8472	-5.89394
4.9671	2.83248		13.6247	7.94757
6.87674	8.47519		-1.65085	-14.9946
-1.10942	-2.04945		-20.8638	5.71588
-25.1722	-10.9433		44.7904	11.2627
-17.2488	-13.764		-4.42071	-10.0679
-7.42713	6.40446		6.62035	8.38429
9.8004	11.1573		30.0083	16.668
27.9425	5.3241		1.43681	-11.7673
-28.6942	-0.652907		-1.33314	-13.0061
-33.5771	-8.08325		5.71367	-12.8937
-44.6572	8.67984		-24.3388	-10.5141
4.21716	11.0672		10.9568	-4.2155
-8.17031	-9.49969		6.35467	9.32352
-18.6327	-13.5608		30.4156	21.2613
-27.2751	-0.751654		34.8027	6.02633
-12.1791	8.29303		49.78	11.1409
-15.8721	2.04556		50.5851	9.55395
-40.4588	8.43694		1.96515	-12.2005
-17.5487	10.5666		14.5252	-13.5729
9.32776	0.383469		31.103	-14.1465
26.2617	2.51525		6.86386	8.9654
5.52166	-9.31721		44.4424	8.14798
-35.2072	-1.37365		23.5282	12.3963
36.7349	19.2058		8.0075	-0.72234
-9.05002	4.79911		28.1164	15.108
6.32788	7.1289		31.2824	-7.54784
-8.91483	-13.7905		-22.788	-11.062
-31.3497	12.1186		49.0456	13.7618
-29.7907	-0.109042		4.91241	2.66832
2.93382	3.88922		4.20541	-3.05675
-22.2232	0.188137		22.2698	-11.8047
-13.2362	-7.81207		10.6947	-8.67552
5.37759	-10.6227		2.04333	-9.73659
1.48985	-1.73767		27.7609	5.44168
18.3753	15.0411		27.2692	19.496
-19.0624	-4.84472		-17.5045	8.70685
-10.1467	-14.7959		14.7381	11.5493
32.814	-8.76135		14.8484	13.6032
-23.4868	-11.1779		5.36322	11.0825
17.9318	-13.0882		23.6755	6.22695
6.46873	4.41926		29.5044	1.657
-14.0479	-5.12681		-3.97608	8.32371
-34.2005	-1.62305		30.443	20.2248
-5.60297	-4.2347		4.03563	-11.4034
-4.95604	-8.97031		29.0204	2.43932
-13.756	-10.0967		-31.2602	0.726858
37.7815	5.16031		-0.100009	0.173204
11.156	-8.39216		28.9785	-17.2283
-7.70076	-6.00061		-43.7062	5.2708
-3.98474	-8.23532		27.4015	4.24105
-14.9966	-11.4135		8.32391	-12.1018
30.4017	-15.458		25.7524	-7.67648
-8.16721	-6.50949		-10.7437	5.5206
28.1776	20.3191		4.0199	-15.2183
-6.72469	2.7968		25.0842	-10.334
30.9616	-15.8237		-23.691	11.9507
24.8816	2.35133		50.6457	9.97898
32.3373	1.7146		30.8095	-18.102
12.5866	4.68685		-14.1669	-13.4927
-8.96701	-6.35877		31.3108	-7.58931
14.0607	0.327221		6.77226	3.00208
41.4928	20.4953		-13.3159	-5.9245
46.0974	8.54281		-10.227	8.60834
4.72876	3.70447		11.8278	-15.7526
32.5726	-12.0445		-0.344703	-8.63316
45.4685	18.3739		26.441	8.05852
51.3527	12.3739		9.63221	6.05673
-15.8152	-10.611		7.47052	-4.60567
15.5393	-14.307		25.8738	-15.1065
12.0295	-15.6855		12.3199	-16.1853
-14.5395	-7.53851		-29.4826	-0.0859858
-20.3523	-12.3542		4.41495	3.35052
11.8425	-7.11107		5.78012	4.14804
-13.9253	-6.26886		-36.1459	-0.292545
-4.36507	-9.33382		-9.2032	0.961792
8.46961	-12.8172		-10.119	-10.3425
-26.7052	-9.71991		-4.22007	-11.0032
24.5176	2.416		12.5995	-7.45116
-16.3324	-10.5649		16.1218	8.5807
32.851	-13.6819		-23.2126	-1.62204
0.630953	-10.0444		-19.0029	-11.0021
-14.2675	9.61728		30.9616	4.90567
-1.54336	-10.5501		-36.0226	-0.293067
13.6461	-13.9459		28.4852	1.38705
24.5007	-10.6743		-17.7273	9.78138
6.91138	0.682519		-37.9959	-0.587889
18.4748	-16.1161		4.3705	11.4148
11.7812	-15.1994		7.12962	10.5831
20.6557	-14.9945		28.6575	5.16452
11.7647	-7.53834		1.8628	9.73347
-4.49421	-7.72112		-18.8067	-12.3495
32.4724	-10.2898		28.715	3.13945
52.5499	0.818054
11.4247	9.13203
28.4736	3.24671

## Sheet: Panel J
	K10MS2 ON				K10MS2 Dynamic				K10MS2 Negative
0	0.433763	0.167368	0.599648		0.50213	0.123595	0.312709		1.03445	0.554756	0.254642
10	1.5555	0.773356	2.24668		1.99248	0.59612	1.24663		4.70156	2.28441	1.11529
20	2.34974	1.53398	2.93832		2.70272	1.28043	1.8532		5.79596	3.10331	1.81159
30	3.31521	2.88481	4.16087		3.60468	2.47169	2.76129		6.61462	4.49208	2.62058
40	4.77236	4.19474	4.99442		4.64477	3.79655	3.89192		6.43264	5.88748	3.77311
50	5.82521	5.10365	5.47526		5.25793	4.76388	4.86989		5.6115	6.02053	5.05077
60	5.94184	5.41373	5.6055		5.4124	5.33552	5.37575		4.87183	5.66473	5.62728
70	5.70738	5.68796	5.44038		5.33031	5.85453	5.68234		4.35082	5.27862	5.67237
80	5.4951	5.74737	5.18913		5.21626	6.10265	5.73287		4.10489	5.05649	5.65223
90	5.52557	5.86839	5.10023		5.12933	6.32442	5.78664		3.82137	4.8566	5.49695
100	5.58692	6.23949	5.06196		5.06577	6.68727	5.96258		3.70023	4.74121	5.5486
110	5.72117	6.5777	5.24971		5.26022	7.06159	6.01834		3.7181	4.78871	5.61188
120	5.94868	6.97571	5.44588		5.52883	7.08479	6.18985		3.78648	5.02958	5.56524
130	6.13161	7.20506	5.72215		5.77512	7.28757	6.23421		4.07502	5.27797	5.68556
140	6.1774	7.12475	5.92776		5.96007	6.95366	6.36684		4.50052	5.48261	5.82154
150	6.19081	6.70023	5.92583		5.98169	6.48839	6.17109		4.89741	5.66661	5.86631
160	5.73936	5.83526	5.65221		5.74373	5.75886	5.82538		5.2615	5.58992	5.8882
170	4.95309	4.84732	5.17988		5.16758	4.80119	5.24533		5.22723	5.21449	5.50708
180	3.90306	3.72024	4.46408		4.4547	3.75151	4.45574		4.92619	4.58931	5.00228
190	2.92809	2.67399	3.52479		3.49263	2.6151	3.48461		4.1911	3.72565	4.15972
200	2.10951	1.82915	2.52414		2.5689	1.77814	2.55605		3.21389	2.66712	3.15525
210	1.41421	1.1844	1.61214		1.82268	1.26943	1.72713		2.24752	1.78555	2.26081
220	0.952888	0.745897	0.972703		1.2532	0.805278	1.07617		1.40616	1.08204	1.41357
230	0.630726	0.478518	0.533454		0.834847	0.530413	0.635492		0.837789	0.629539	0.835079
240	0.401804	0.30203	0.270855		0.555604	0.297744	0.347837		0.437877	0.347295	0.414927
250	0.238349	0.16741	0.166557		0.446453	0.160793	0.172787		0.219413	0.168719	0.171748
260	0.0506493	0.0174592	0.0154408		0.294983	0.0189195	0.0173433		0.0139291	0.0146623	0.0173886
