# Supplementary material for: Live imaging reveals chromatin compaction transitions and dynamic transcriptional bursting during stem cell differentiation in vivo
Source: eLife journal article supplement (doi:10.7554/elife.83444), 2023-03-07

**A**

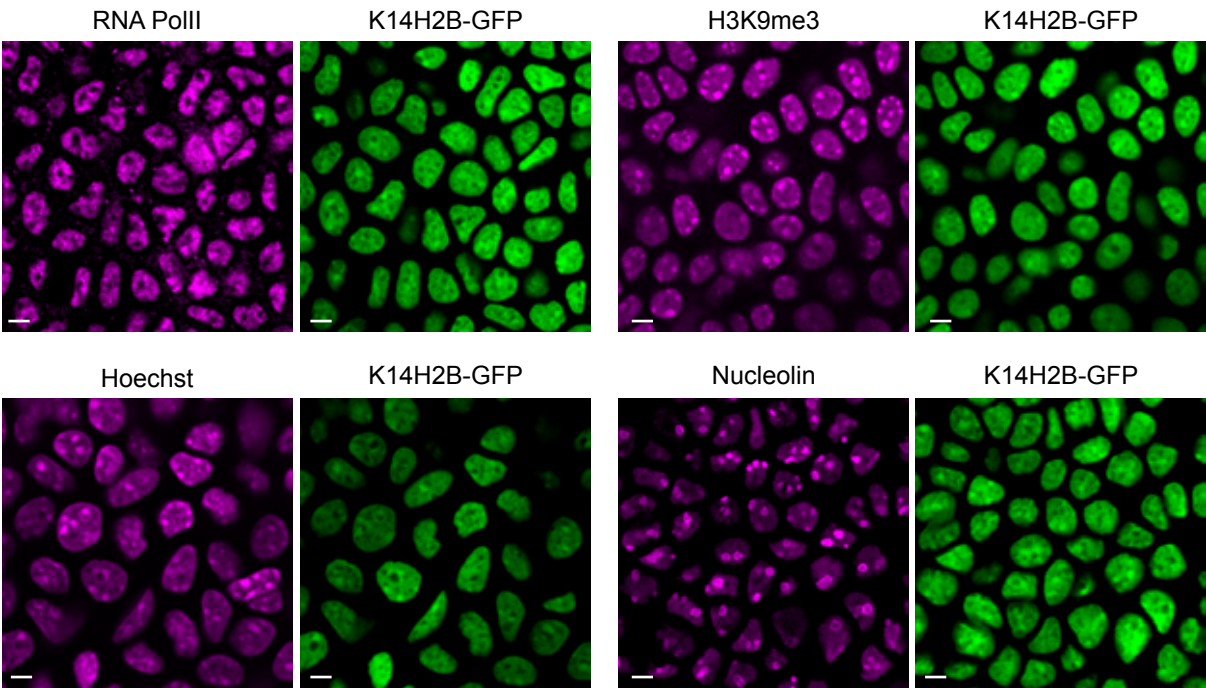

**B**

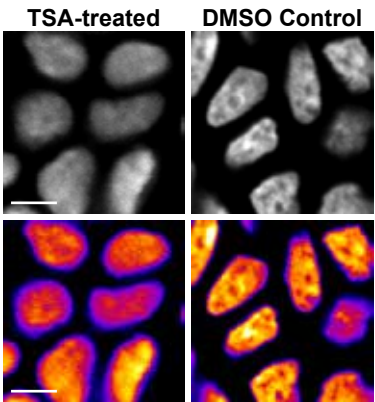

**C**

Example comparison of data organization between RNA-seq and chromatin compaction

|        | Gene 1  | Gene 2  | Gene 3   | ... |
|--------|---------|---------|----------|-----|
| Cell 1 | 0 reads | 3 reads | 12 reads |     |
| Cell 2 | 4 reads | 1 read  | 3 reads  |     |
| Cell 2 | 0 reads | 0 reads | 8 reads  |     |
| ...    |         |         |          |     |

|           | Bin 1 | Bin 2 | Bin 3 | ... |
|-----------|-------|-------|-------|-----|
| Nucleus 1 | 0.4 % | 2.0 % | 1.8 % |     |
| Nucleus 2 | 1.1 % | 3.4 % | 4.1 % |     |
| Nucleus 3 | 1.6 % | 0.9 % | 6.2 % |     |
| ...       |       |       |       |     |

**D**

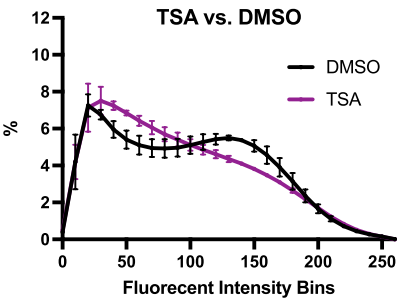

**D'**

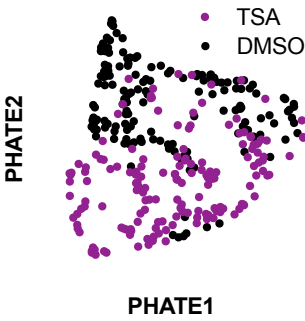

Supplement: supp [file elife-83444-supp-v1.zip]
