# Supplementary figures and images for: Live imaging reveals chromatin compaction transitions and dynamic transcriptional bursting during stem cell differentiation in vivo
Source: eLife journal article supplement (doi:10.7554/elife.83444), 2023-03-07

**A**

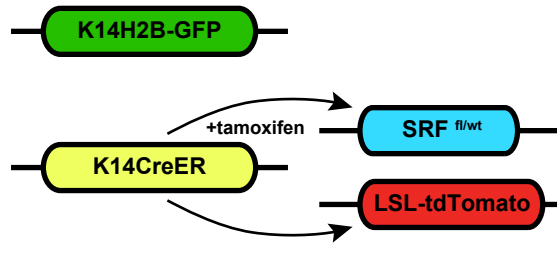

**C**

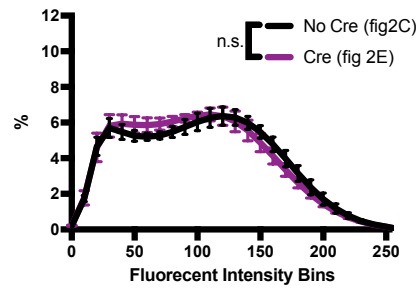

**B**

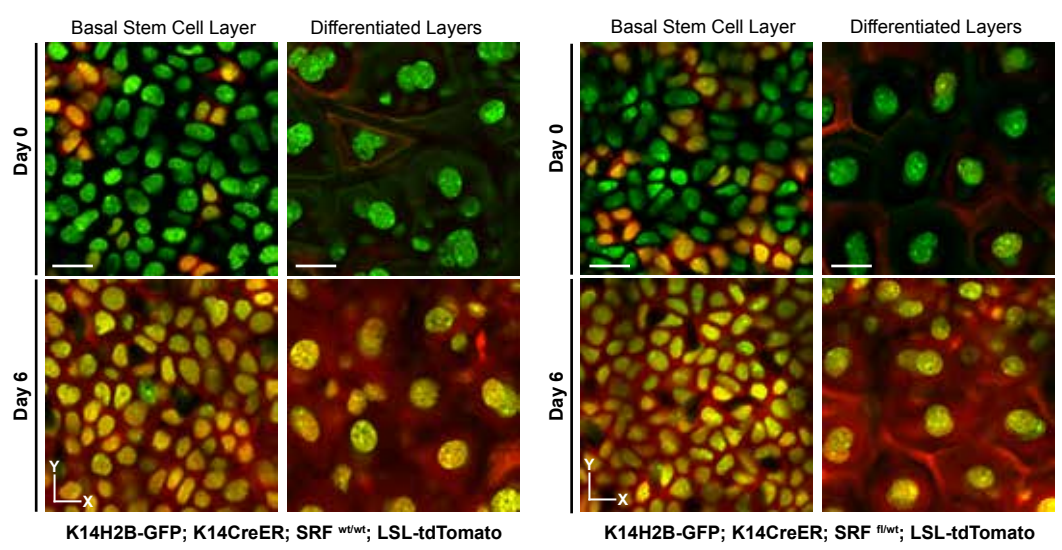

Supplement: supp [file elife-83444-supp-v1.zip]

**A**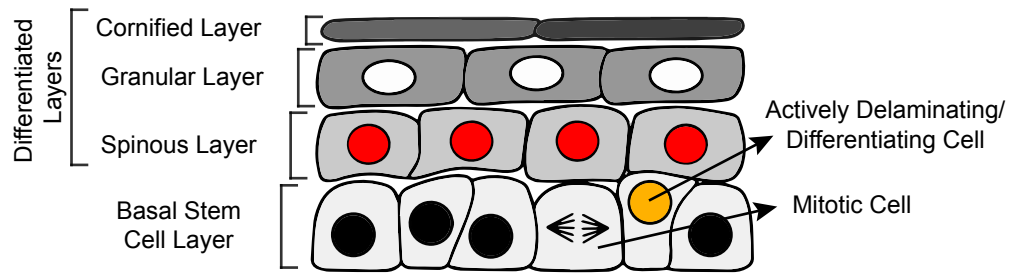**B**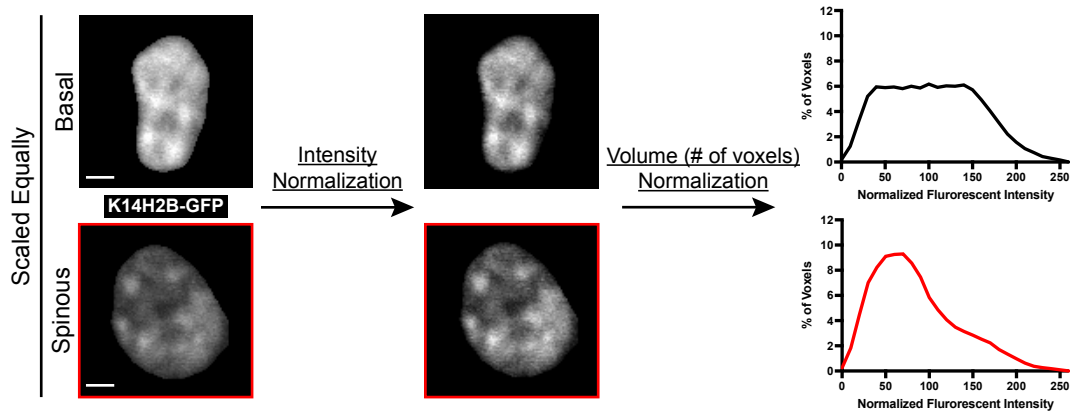**C**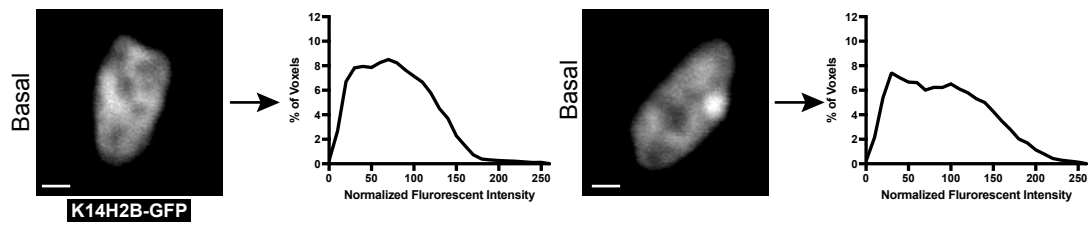

Supplement: supp [file elife-83444-supp-v1.zip]

**A**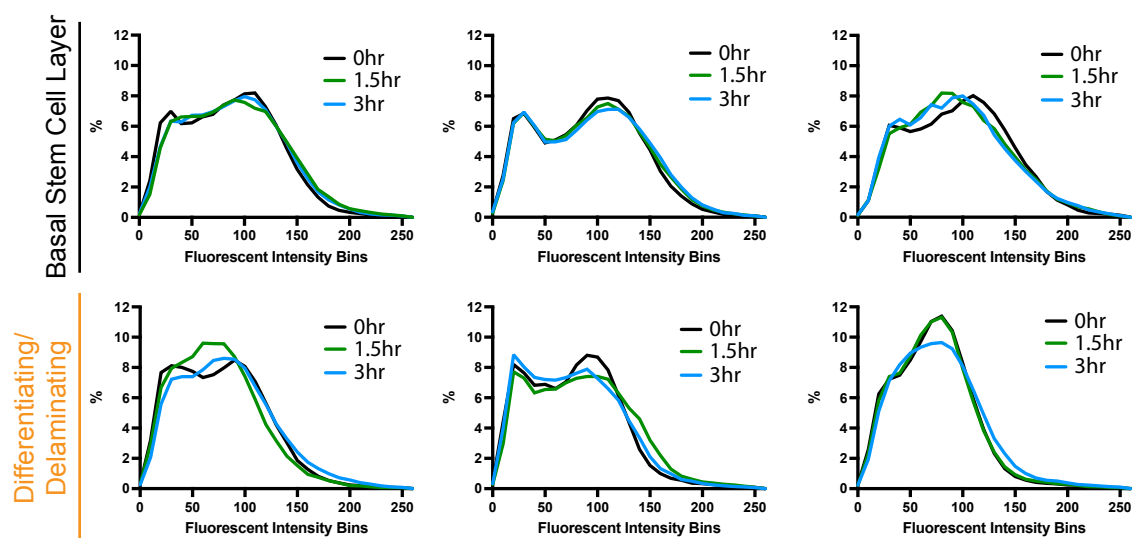**B**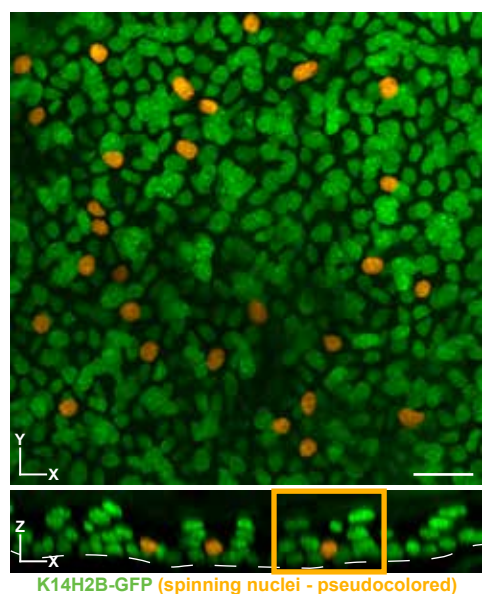**C**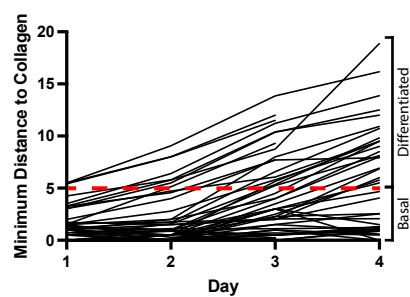**D**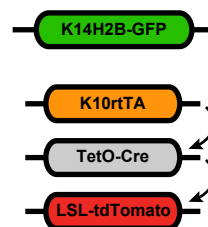

Supplement: supp [file elife-83444-supp-v1.zip]

**A**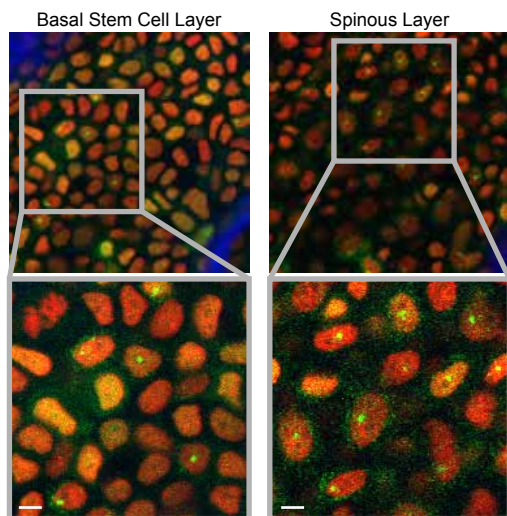**B**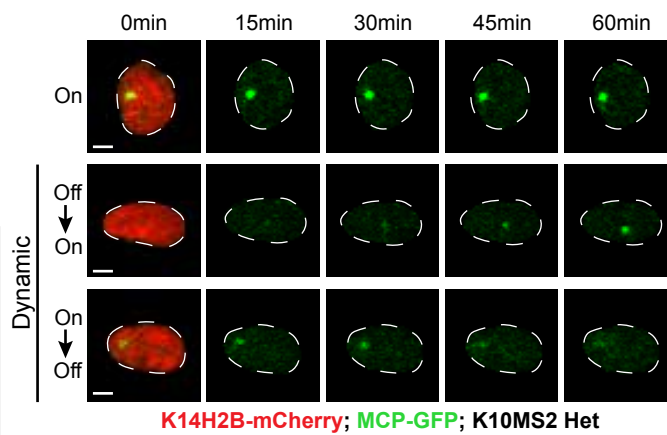**C**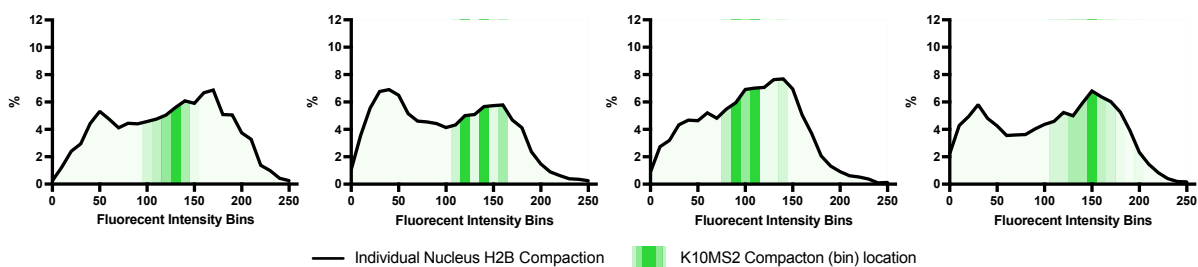**D**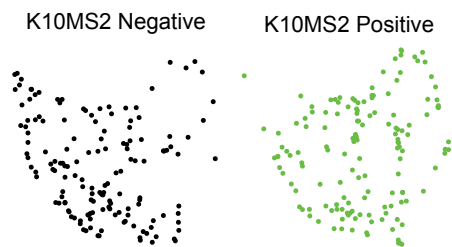

Supplement: supp [file elife-83444-supp-v1.zip]
